1 **Transcriptional network analysis of transcriptomic diversity in resident tissue macrophages and**  
2 **dendritic cells in the mouse mononuclear phagocyte system.**

3

4 Kim M. Summers\*, Stephen J. Bush<sup>#</sup> and David A. Hume\*

5

6 \*Mater Research Institute-University of Queensland, Translational Research Institute, Woolloongabba,  
7 Qld 4102, Australia and <sup>#</sup>Nuffield Department of Clinical Medicine, John Radcliffe Hospital, University  
8 of Oxford, Oxford, UK.

9

10 The three authors contributed equally to this work.

11

12 Address for correspondence

13 Professor David Hume

14 Mater Research Institute-University of Queensland

15 Translational Research Institute

16 37 Kent Street

17 Woolloongabba, Qld 4102

18 Australia

19 David.Hume@uq.edu.au

20

21

22

23

24 **Abstract**

25

26 The mononuclear phagocyte system (MPS) is a family of cells including progenitors, circulating blood  
27 monocytes, resident tissue macrophages and dendritic cells (DC) present in every tissue in the body. To  
28 test the relationships between markers and transcriptomic diversity in the MPS, we collected from  
29 NCBI-GEO >500 quality RNA-seq datasets generated from mouse MPS cells isolated from multiple  
30 tissues. The primary data were randomly down-sized to a depth of 10 million reads and requantified.  
31 The resulting dataset was clustered using the network analysis tool *Graphia*. A sample-to-sample matrix  
32 revealed that MPS populations could be separated based upon tissue of origin. Cells identified as  
33 classical DC subsets, cDC1 and cDC2, and lacking *Fcgr1* (CD64), were centrally-located within the  
34 MPS cluster and no more distinct than other MPS cell types. A gene-to-gene correlation matrix  
35 identified large generic co-expression clusters associated with MPS maturation and innate immune  
36 function. Smaller co-expression gene clusters including the transcription factors that drive them showed  
37 higher expression within defined isolated cells, including macrophages and DC from specific tissues.  
38 They include a cluster containing *Lyve1* that implies a function in endothelial cell homeostasis, a cluster  
39 of transcripts enriched in intestinal macrophages and a generic cDC cluster associated with *Ccr7*.  
40 However, transcripts encoding many other putative MPS subset markers including *Adgre1*, *Itgax*,  
41 *Itgam*, *Clec9a*, *Cd163*, *Mertk*, *Retnla* and *H2-a/e* (class II MHC) clustered idiosyncratically and were  
42 not correlated with underlying functions. The data provide no support for the concept of markers of M2  
43 polarization or the specific adaptation of DC to present antigen to T cells. Co-expression of immediate  
44 early genes (e.g. *Egr1*, *Fos*, *Dusp1*) and inflammatory cytokines and chemokines (*Tnf*, *Il1b*, *Ccl3/4*)  
45 indicated that all tissue disaggregation protocols activate MPS cells. Tissue-specific expression clusters  
46 indicated that all cell isolation procedures also co-purify other unrelated cell types that may interact  
47 with MPS cells *in vivo*. Comparative analysis of public RNA-seq and single cell RNA-seq data from  
48 the same lung cell populations showed that the extensive heterogeneity implied by the global cluster  
49 analysis may be even greater at a single cell level with few markers strongly correlated with each other.  
50 This analysis highlights the power of large datasets to identify the diversity of MPS cellular phenotypes,  
51 and the limited predictive value of surface markers to define lineages, functions or subpopulations.

## 52 INTRODUCTION

53 The mononuclear phagocyte system (MPS) [1] is a family of cells present in every tissue in the body  
54 including progenitors, circulating blood monocytes and resident tissue macrophages [2-5]. Within each  
55 tissue, resident macrophages occupy territories with a regular distribution, commonly associated with  
56 epithelial and endothelial surfaces (reviewed in [5]). The proliferation, differentiation and survival of  
57 most resident macrophage populations depends upon signals from the macrophage-colony-stimulating  
58 factor receptor (CSF1R) initiated by one of two ligands, CSF1 or IL34 [6, 7]. Based upon detection of  
59 macrophage-restricted mRNA, including *Csf1r*, the relative abundance of resident macrophages in most  
60 organs in mice was shown to reach a maximum in the first week of postnatal life and remains stable  
61 thereafter during postnatal growth [8]. Lineage-trace studies in the C57BL/6 strain suggest that many  
62 macrophage populations established in the mouse embryo are maintained in adults mainly by self-  
63 renewal, whereas others are replaced progressively to differing extents by blood monocytes derived  
64 from bone marrow progenitors throughout life [9-11]. Most if not all tissue macrophage populations can  
65 be generated and maintained in the absence of blood monocytes due to the intrinsic homeostatic  
66 regulation by circulating CSF1 [12]. The precise details of ontogeny, turnover and homeostasis of  
67 resident macrophages may not be conserved across mouse strains or species [5]. However, regardless  
68 of their steady-state turnover, all resident macrophages including the microglia of the brain can also be  
69 rapidly replaced by blood monocytes following experimental depletion ([3-5, 12] and references  
70 therein).

71 Within individual tissues, resident macrophages acquire specific adaptations and gene expression  
72 profiles [2, 5, 13-15]. These adaptations contribute to survival as well as function and involve inducible  
73 expression of transcription factors and their downstream target genes. At least some of these  
74 transcription factors act by regulating *Csf1r* expression. Deletion of a conserved enhancer in the mouse  
75 *Csf1r* gene leads to selective loss of some tissue macrophage populations, whereas others express *Csf1r*  
76 normally [16]. In the mouse embryo, where abundant macrophage populations are engaged with  
77 phagocytosis of apoptotic cells [17], the macrophage transcriptome does not differ greatly between

78 organs. Tissue-specific macrophage adaptation occurs mainly in the postnatal period as the organs  
79 themselves exit the proliferative phase and start to acquire adult function [8, 15].

80 Classical dendritic cells (cDC) are commonly defined functionally on the basis of a proposed unique  
81 ability to present antigen to naïve T cells, a concept that requires a clear distinction between DC and  
82 macrophages [18]. It remains unclear as to whether cDC should be considered part of the MPS and the  
83 extent to which they can be defined by surface markers [12]. The situation is confused by the widespread  
84 use of the term DC to describe any antigen-presenting cell (APC) including cells that are clearly derived  
85 from blood monocytes [19]. An attempt at consensus proposed an MPS nomenclature classification  
86 based upon ontogeny, and secondarily upon location, function and phenotype [20]. The proposal  
87 separates monocyte-derived APC from cDC subsets: cDC1, dependent on the transcription factor  
88 BATF3, and cDC2, dependent upon IRF4. Some support for this separation came from analysis of an  
89 *Ms4a3* reporter transgene, which labelled cells derived from committed granulocyte-macrophage  
90 progenitors and distinguished monocyte-derived cells from tissue DC [10]. Secondary classification is  
91 based upon cell surface markers that are presumed to be linked in some way to ontogeny. The proposed  
92 development pathway of these DC subsets from a common myeloid progenitor, via a common DC  
93 progenitor (CDP), has been reviewed recently [21].

94 Even within tissues resident macrophages are extremely heterogeneous [22, 23]. Since the advent of  
95 monoclonal antibodies and later development of transgenic reporter genes [24] numerous markers have  
96 been identified that segregate the MPS into subpopulations. Amongst the recent suggestions, LYVE1  
97 was proposed as a marker of macrophages associated with the vasculature [25], CD64 (*Fcgr1* gene) and  
98 MERTK as markers that distinguish macrophages from classical DC [26, 27] and CD206 (*Mrc1* gene)  
99 as a marker of so-called M2 macrophage polarization [28]. Several surface markers have also been  
100 identified that are encoded by genes expressed only in macrophages in specific tissues (e.g. *Clec4f*,  
101 *Tmem119*, *Siglecf* [22, 23]). Other markers define macrophages in specific locations within a tissue, for  
102 example CD169 (encoded by *Siglec1*) in the marginal zone of spleen and hematopoietic islands in bone  
103 marrow [29]. In the case of blood monocytes, the subpopulations are clearly a differentiation series in  
104 which short-lived LY6C<sup>hi</sup> “classical” monocytes give rise in a CSF1R-dependent manner [30] to long-

105 lived LY6C<sup>lo</sup> non-classical monocytes via an intermediate state [11, 30, 31]. This is likely also the case  
106 in tissues such as the liver [32] and intestine [33, 34]. More recently, mouse tissue macrophage  
107 heterogeneity has been analysed using multiparameter flow cytometry and single cell RNA-seq [35].

108 Mechanistically, the association between marker expression and cellular function depends upon  
109 coordinated transcriptional regulation. One way to identify coregulated sets of transcripts is to cluster  
110 large transcriptomic datasets. This approach was used to create transcriptional atlases in multiple  
111 species and identify lineage-specific transcription factors and their target genes [36-40]. It enabled the  
112 extraction of a generic tumour-associated macrophage signature from multiple large cancer datasets  
113 [41]. Previous meta-analysis of large microarray datasets [36, 37, 40] as well as a reanalysis of data  
114 from the ImmGen Consortium [42] indicated a clear separation between mouse MPS cells and other  
115 leukocyte lineages but did not support the basic premise that markers can separate macrophages from  
116 DC or define lineages within the MPS.

117 Over the past 5 years, RNA sequencing (RNA-seq) has supplanted microarrays as an approach to  
118 expression profiling. The recent cascade of interest in tissue-specific macrophage adaptation has  
119 produced RNA-seq data for MPS cells isolated from most major organs of C57BL/6 mice. To enable  
120 comparative analysis of datasets from multiple laboratories, we devised an automated informatics  
121 pipeline employing random sampling of RNA-seq data to a common depth and quantification using the  
122 pseudo-aligner Kallisto. Robust transcriptional atlases for the chicken [43] and pig [44] were generated  
123 using datasets from numerous divergent sources. Using the same basic pipeline, we identified a total of  
124 around 500 RNA-seq libraries generated from isolated macrophage and cDC populations from 24  
125 different studies that sample mouse MPS transcriptional diversity (**Table 1**). Here we apply  
126 transcriptional network clustering to this large dataset to analyse transcriptional adaptation across the  
127 entire mouse MPS.

128

129

## 130 **METHODS**

131 The RNA-seq datasets from within the BioProjects shown in **Table 1** were downloaded from the  
132 European Nucleotide Archive (ENA). **Table S1** contains all the SRA and NCBI accessions and sample  
133 descriptions. Individual BioProjects differ in methods of mRNA isolation, library preparation and  
134 sequencing methods, length, depth and strandedness, but previous analysis in other species [43, 44]  
135 indicated that they can still produce comparable expression level estimates. We initially included data  
136 from the large ImmGen UL1 project (GSE1272671; GSE124829; see [45]) but this project uses a novel  
137 ultra-low input RNA-seq pipeline based upon 1000 sorted cells and the single cell RNA sequencing  
138 (scRNA-seq) platform Smartseq2. Our analysis revealed a large batch effect relative to all other samples,  
139 and we therefore excluded these data. To reduce possible effects of sampling depth, and generate a  
140 common normalisation, the sequences were each randomly down-sampled to a depth of 10 million reads  
141 per library as described [43] and requantified using Kallisto v0.44.0 [46]. Kallisto quantifies expression  
142 at the transcript level, as transcripts per million (TPM), by building an index of k-mers from a set of  
143 reference transcripts and then ‘pseudo-aligning’ reads to it, matching k-mers in the reads to k-mers in  
144 the index. The selected BioProjects include subsets of resident tissue macrophages defined using surface  
145 markers and isolated by FACS from one tissue as well as temporal profiles of adaptation from monocytes  
146 to tissue macrophages. The purpose of this analysis was to identify clusters of transcripts that are  
147 robustly correlated. For this purpose, the diversity of transcriptomic space sampled is an asset.

148 Prior to network analysis, transcripts that were not detected at an arbitrary threshold of 10 TPM in at  
149 least one sample were removed to minimise stochastic sampling noise intrinsic in RNA-seq data. Given  
150 the nature of the samples, this also helps to reduce the low-level representation of transcripts derived  
151 from contaminating cells of non-myeloid origin. Of the 18,175 transcripts that met this minimum  
152 threshold, 11,578 were detected in at least 90% of RNA-seq datasets and 6,901 had a median expression  
153 >10 TPM. The TPM estimates for the 18,175 transcripts in all of the datasets included are provided in  
154 **Table S1**.

155 Network analysis was performed using the program *Graphia Professional* ([https://kajeka.com/graphia-](https://kajeka.com/graphia-professional/)  
156 [professional/](https://kajeka.com/graphia-professional/)). Pairwise Pearson correlations ( $r$ ) were calculated between all samples to produce a

157 sample-to-sample correlation matrix and inversely between all pairs of genes to produce a gene-to-gene  
158 correlation matrix. Gene co-expression networks (GCNs) were generated from the matrix, where nodes  
159 represent genes and edges represent correlations between nodes above a defined correlation threshold.  
160 For the sample-to-sample analyses an initial screen at the  $r$  value which entered all samples was  
161 performed, followed by subsequent analyses with higher  $r$  value to remove outliers and reveal more  
162 substructure in the networks. For each gene-to-gene analysis the  $r$  value was adjusted to retain the  
163 maximum number of transcripts with the minimum number of edges [43].

164

## 165 RESULTS AND DISCUSSION

### 166 Expression profiles of individual transcripts

167 To overview the heterogeneity of the macrophages and the effectiveness of normalisation we first  
168 considered the expression profiles of selected individual transcripts to explore the housekeeping genes  
169 and surface markers used in studies of MPS cells. The choice of appropriate reference genes for qRT-  
170 PCR is a significant issue in many studies, including macrophage differentiation [47]. **Figure 1A** shows  
171 candidate house-keeping genes (*Hprt*, *Actb*, *B2m*, *Gapdh*, *Ppia*) that are commonly used in qRT-PCR  
172 as reference genes. These transcripts vary between datasets and BioProjects but in pairwise analysis  
173 were only weakly correlated with each other (**Figure 1B**).

174 **Figure 2A** shows the expression pattern of transcripts encoding surface markers used to separate some  
175 of the subpopulations herein: *Adgre1* (F4/80), *Cd4*, *Cd74* (Class II MHC), *Csf1r* (CD115), *Cx3cr1*,  
176 *Fcgr1* (CD64), *Icam2*, *Itgax* (CD11C), *Lyve1*, *Mertk*, *Mrc1* (CD206), and *Tnfrsf11a* (RANK). **Figure**  
177 **2B** shows a summary of the correlations between them. Consistent with studies using *Csf1r* reporter  
178 transgenes [48, 49], *Csf1r* mRNA was universally expressed in MPS cells albeit with significant  
179 variation in level, being highest in microglia and lowest in cDC1. *Csf1r* was correlated ( $r>0.5$ ) with  
180 *Adgre1*, *Fcgr1*, *Cx3cr1*, *Mertk* and *Tnfrsf11a* but these transcripts were less correlated with each other.  
181 *Mrc1* was reported to be correlated with expression of *Lyve1* and inversely with MHCII [25, 50]. Across  
182 the entire spectrum of macrophage transcriptomes, *Mrc1* was correlated with *Lyve1* but was more  
183 widely-expressed (**Figure 2A**). There was no evidence of an inverse correlation between *Mrc1* and *Cd74*  
184 or other MHCII-associated transcripts.

### 185 Network analysis of relationships of MPS populations and expressed transcripts

186 To determine whether any transcripts encoding surface markers were correlated with cellular phenotype  
187 we used the graph-based network analysis tool *Graphia Professional*. **Figure 3** presents a sample-to-  
188 sample correlation matrix generated using the Fruchterman-Rheingold algorithm in *Graphia*, showing  
189 the clear segregation of the tissue-specific macrophage populations (**Figure 3A**). Consistent with  
190 previous analysis of microarray datasets [37, 39, 40, 42] the isolated spleen, lung and lymph node DC  
191 subpopulations clustered together in the middle of the graph (red nodes in **Figure 3B**). Based upon their



192 overall transcriptomic profile, the DC were no more divergent from other MPS populations than the  
193 isolated macrophages purified from different tissues were from each other. The apparent relationship  
194 to BioProject (**Figure 3C**) occurs mainly because most studies were focussed on a particular tissue or  
195 cell type. There may also be impacts from differing methods of extracting and processing RNA and low  
196 depth and single end libraries compared to high depth/paired end libraries but these did not produce  
197 obvious outliers.

198 The gene-centred network (GCN) for the same dataset was developed at an  $r$  value of 0.75 chosen based  
199 on the graph of network size vs correlation threshold shown in **Figure S1**. **Figure 4A** shows the whole  
200 network and **Figure 4B** highlights the tissue specific clusters and those that contain markers of other  
201 cell types, as discussed below. **Table S2** summarises the coexpressed gene clusters and the average gene  
202 expression profiles of the clusters containing at least 10 nodes (transcripts). The graphs are colour-coded  
203 to indicate the tissue origin and cell-type as in **Figure 1** (samples are listed in the Readme sheet of **Table**  
204 **S2**). An additional sheet in **Table S2** provides GO term enrichment of the larger clusters. For ease of  
205 visualisation relative to sample information, profiles of surface markers and transcription factors  
206 discussed below are provided as an additional sheet in **Table S1**. **Table 2** provides an overview of the  
207 major functional clusters discussed in more detail below. It is beyond the scope of this study to analyse  
208 and cite published evidence related to every transcript in detail. In **Table 2**, individual genes from within  
209 the cluster have been included based their candidate role as transcriptional regulators and upon known  
210 associations with mononuclear phagocyte biology determined by PubMed search on *Genename* AND  
211 *macrophage* or *dendritic cell*. On the principal of guilt-by-association [36-40] there are hundreds of  
212 other genes within these clusters that have inferred functions in innate immunity and mononuclear  
213 phagocyte biology.

#### 214 **Major macrophage-enriched co-regulated clusters**

215 At the chosen  $r$  value of 0.75, the GCN approach using the normalised data from multiple laboratories  
216 identified many co-regulated clusters of transcripts that are consistent with knowledge inferred from  
217 smaller datasets.

218 Cluster 1 is a generic MPS cluster which drives the relatively close association between all of the  
219 samples, including the different subclasses of DC, in the sample-to-sample network (**Figure 2A**) and  
220 distinguishes MPS cells from other leukocytes. It includes *Csf1r*, *Fcgr1*, *Cd68*, *Sirpa*, *Tnfrsf11a* and  
221 the core myeloid transcription factor gene *Sp1* alongside many other known macrophage-enriched  
222 transcription factors [51, 52]. One notable inclusion is the glucocorticoid receptor gene, *Nr3c1*, which  
223 mediates transcriptional activation of a wide-range of anti-inflammatory genes in macrophages [53]. As  
224 one might expect from the known endocytic and secretory activity of MPS cells, the cluster is enriched  
225 for GO terms related to endosome/lysosome and intracellular transport/secretion that are major  
226 constitutive functions of mononuclear phagocytes [36] (**Table S2**). Transcripts in Cluster 3 were also  
227 expressed widely in MPS cells but the cluster has a distinct average expression profile. Cluster 3  
228 includes genes encoding several forkhead transcription factors (*Foxo3*, *Foxo4*, *Foxk1* and *Foxk2*), the  
229 key transcriptional regulators of autophagy [54-56], and *Nfat5* which controls macrophage apoptosis  
230 [57]. This cluster also contains *Mertk*, the perforin-like immune effector gene *Mpeg1*, *Aim2*, which  
231 encodes a sensor for cytoplasmic DNA [58] and transcripts for numerous DEAH- and DEAD box  
232 helicases all implicated in DNA sensing in innate immunity [59]. There are also members of the NAIP  
233 family of inflammasome regulators (*Naip2*, 5, 6); reviewed in [60]). We infer that this cluster of  
234 transcripts reflects an independently-regulated capacity for innate immune recognition of internalised  
235 pathogens. Other than *Mertk*, there is no obvious plasma membrane marker associated with this set of  
236 candidate innate immune effector genes.

237 Genes in Cluster 4 were strongly expressed in samples from brain and include microglia-enriched  
238 markers that are depleted in brains of *Csf1r*-deficient mice and rats, such as *Cx3cr1*, *Tmem119*, *P2ry12*  
239 and the key transcription factor genes *Sall1*, *Sall2* and *Sall3* [16, 61]. Cluster 9 contains the S phase  
240 transcription factor gene *Foxm1* and numerous cell cycle-associated transcripts [62] and the GO term  
241 enrichment supports a cell cycle association. The cell cycle cluster was expressed in all isolated MPS  
242 populations at various levels consistent with evidence that they are capable of self-renewal in the steady  
243 state [5, 12]. The separation of this cluster indicates that proliferative activity is not tightly-linked to any  
244 MPS differentiation state or surface marker.

## 245 Identification of a capillary-associated expression cluster

246 Most macrophages and DC included in this analysis were purified by FACS based upon their expression  
247 of specific markers including those shown in **Figure 1B** (see **Table 1**). Chakarov et al. [25] identified a  
248 population of pericapillary cells in the lung that expressed LYVE1 and extended their analysis to FACS-  
249 separated cells from fat, heart and dermis. Their RNA-seq results are included in our dataset. Based  
250 upon analysis of differentially expressed genes, the authors identified a set of genes with high expression  
251 in sorted LYVE1<sup>hi</sup> macrophages relative to LYVE1<sup>lo</sup> macrophages across the four tissues, including  
252 *Mrc1*, *Timd4*, *Cd51*, *Fcna* and *Vsig4* [25, 50]. The GCN reveals that there is, indeed, a set of transcripts  
253 (Cluster 22) that is strongly correlated with *Lyve1* expression across a larger spectrum of tissues. The  
254 cluster includes *Mrc1* but excludes *Timd4*, *Cd51*, *Fcna*, and *Vsig4*, which were associated with distinct  
255 tissue-specific clusters (**Table 2**). The correlation between *Lyve1* and *Mrc1* is actually lower than the  
256 cluster threshold of 0.75 ( $r=0.62$ , **Figure 2B**). The two genes were included in Cluster 22 because of  
257 shared links to other genes. In fact, *Mrc1* was only marginally-enriched in the purified LYVE1<sup>hi</sup>  
258 macrophages from fat, heart, lung and skin [25] and it was highly-expressed in isolated cells from  
259 adipose, brain, intestine, kidney and liver that lack *Lyve1* mRNA (see **Table S1**/selected transcripts).  
260 We conclude that most LYVE1<sup>hi</sup> macrophages express *Mrc1*, but the reciprocal relationship does not  
261 hold.

262 The set of co-expressed genes in Cluster 22 suggests a function for LYVE1<sup>hi</sup> macrophages in control of  
263 endothelial biology and vascular permeability. It includes genes for two of the sphingosine-1-phosphate  
264 receptors (*S1pr1/2*) which have been implicated in many aspects of inflammation, lymphangiogenesis  
265 and angiogenesis [63, 64], the vanilloid receptor (*Trpv4*), which controls capillary barrier function and  
266 inflammation [65, 66] and neuropilin 1 (*Nrp1*) which controls endothelial homeostasis [67]. Cluster 22  
267 also contains the erythropoietin receptor gene (*Epor*), which was shown to synergise with S1P to  
268 promote apoptotic cell clearance by macrophages [68] and the EGF receptor gene (*Egfr*) which has also  
269 been shown to regulate macrophage function in a range of inflammatory models [69]. Indeed, the co-  
270 expressed genes might support the known functional association of macrophages with lymphatic as well  
271 as blood vessels [70]. The *Lyve1*-associated cluster contains genes for three novel candidate

272 transcriptional regulators *Etv1*, *Nfatc2* and *Tcf4*. *Etv1* expression in macrophages has been implicated  
273 in functional polarization *in vitro* and the response to altered mitochondrial membrane potential [71].  
274 *Nfatc2* is required for osteoclast differentiation *in vitro* [72] but roles in macrophage  
275 differentiation/function have not been explored. *Tcf4* encodes a transcription effector of Wnt/ $\beta$ -catenin  
276 pathway, implicated in responses to E-cadherin and other effectors in macrophage differentiation [73].  
277 *Mrc1* is commonly referred to as a marker for alternative or M2 macrophage polarization [74]. Another  
278 putative marker of M2 polarization is the somatic growth factor insulin-like growth factor 1 (*Igfl* gene)  
279 [75]. *Igfl* was correlated with *Mrc1* ( $r=0.67$ ) but did not form part of a co-expression cluster. It was  
280 absent from monocytes and DC but was highly-expressed in most resident tissue macrophages (see  
281 **Table S1**/selected transcripts). *Igfl* is CSF1-inducible and of particular interest because of the profound  
282 impact of *Csf1r* mutations in multiple species on postnatal growth and development [7]. Unlike  
283 hepatocytes and mesenchymal cells, tissue macrophages did not express transcripts encoding the growth  
284 hormone receptor (*Ghr*), *Igflr*, or the *Igfl* binding protein genes (*Igfals*, *Igfbp1,2,3,5,6*). The exception  
285 is *Igfbp4* which was highly-expressed in most macrophage populations and did form part of the  
286 *Lyve1/Mrc1*-associated Cluster 22. Interestingly, *Igfbp4* knockout in mice mimics impacts of *Csf1r*  
287 deficiency on somatic growth and adipose formation [76, 77].

288 The intimate association of macrophages with capillaries was evident from the first localization of the  
289 F4/80 antigen [78]. *Adgre1* expression was also correlated with *Mrc1* ( $r=0.64$ ; Figure 2B), but it was  
290 more widely-expressed than either *Mrc1* or *Lyve1* and therefore not within Cluster 22. *Adgre1* was not  
291 enriched in any of the purified LYVE1<sup>hi</sup> macrophage populations relative to LYVE1<sup>lo</sup> cells from the  
292 same tissue [25]. It was high in most isolated tissue macrophages and induced during differentiation of  
293 monocytes *in situ* as in the liver dataset [32] and the intestinal developmental series [33, 34]. F4/80 was  
294 proposed as a marker of macrophages of embryonic origin [79] but *Adgre1* was equally high in intestinal  
295 macrophages, which turn over rapidly from monocytes [80, 81] and in cDC2. It was also strongly  
296 induced during monocyte differentiation to occupy a vacant Kupffer cell niche [32]. Whatever the  
297 association with ontogeny, the pattern is rodent-specific. *Adgre1* is a rapidly-evolving gene and the  
298 expression pattern also varies across species [82].

## 299 Tissue-specific macrophage clusters

300 Several co-expressed clusters were associated with MPS cells isolated from a single tissue. Aside from  
301 the large brain-enriched expression cluster (Cluster 4) that contains many microglia markers, Cluster 10  
302 was lung-enriched and contains the alveolar macrophage marker *Siglecf* and key transcription factor  
303 *Pparg* [15]. Cluster 12 was shared amongst liver Kupffer cells (KC), peritoneal macrophages and  
304 splenic macrophages and includes the transcription factors *Id3*, *Nr1h3* and *Smad6* and markers *Cd51*,  
305 *Clec4f* and *Vsig4* [15, 32, 34]. A novel finding was the strong coexpression ( $r = 0.81$ ) between *Nr1h3*  
306 and *Rxra*, the gene encoding its promiscuous heterodimerisation partner, which is also implicated in  
307 control of KC lipid and iron metabolism [83] and may have independent function in innate immune  
308 regulation [84].

309 The average expression of Cluster 12 increased progressively in the monocyte-KC differentiation series  
310 [32] included in this dataset (see profile in **Figure S2**). Cluster 12 also reveals the regulated and  
311 coordinated expression of the thyroid hormone receptor (*Thrb*), likely mediating the many impacts of  
312 thyroid hormones in innate immune function [85]. One other novel candidate regulator identified in this  
313 cluster is *Zbtb4* which encodes an epigenetic regulator with a high affinity for methylated CpG. *Zbtb4*  
314 <sup>-/-</sup> mice are viable and fertile but growth retarded compared to littermates [86]. Impacts on myeloid  
315 differentiation have not been reported. The transcription factor SPIC is implicated in splenic red pulp  
316 macrophage differentiation and iron homeostasis [87, 88]. Although *Spic* mRNA was highest in red pulp  
317 macrophages, KC and bone marrow macrophages, it was detected in other macrophage and DC  
318 populations and therefore has a unique expression profile. Cluster 21 contains transcripts most highly-  
319 expressed in resident peritoneal macrophages and includes the genes for the transcription factor *Gata6*  
320 and the retinoic acid receptor (*Rarb*) which control peritoneal macrophage survival and adaptation [89,  
321 90]. The data confirm the specific high expression of the enigmatic plasminogen activator inhibitor  
322 encoded by *Serpib2* in resident peritoneal macrophages, first described >20 years ago [91] and still  
323 seeking a function [92].

324 Genes in Cluster 15, including the monocyte-specific chemotactic receptor *Ccr2*, were highly expressed  
325 in classical monocytes. Genes in Cluster 43 were expressed specifically in Langerhans cell (LC). They

326 include the marker *Cd207* (langerin), used in the purification of LC [93] but also expressed at lower  
327 levels in many other tissue macrophage populations. This cluster did not include the gene for another  
328 LC marker, *Epcam* [93]. It was highly-expressed in LC but also detected in one set of intestinal  
329 macrophage samples, most likely a contamination with epithelial cells (Cluster 5, see below). Epidermal  
330 LC have at times been considered as DC-like because of their migratory and APC properties but are  
331 now considered to be specialized resident tissue macrophages [94]. Unlike most classical DC in  
332 lymphoid tissue, they are clearly CSF1R-dependent and share with several other macrophage  
333 populations dependence on the conserved enhancer in the *Csf1r* locus [16]. Cluster 43 did not include a  
334 transcriptional regulator specific to LC. In common with several other macrophage populations, LC  
335 differentiation is regulated by TGF $\beta$  signaling, involving transcription factors RUNX3 and ID2 [94].  
336 Both transcription factor genes were highly-expressed in LC but also present in several other tissue  
337 macrophage populations.

338 Intestinal macrophage-enriched gene expression profiles, which have not previously been identified,  
339 emerge in Cluster 38. Two large separate datasets of intestinal macrophages were included here [33,  
340 34], both likely reflecting a differentiation series of adaptation from blood monocytes to resident  
341 intestinal tissue macrophages [5]. In one case, CD4 and TIM4 were used as markers [34] but each of  
342 these markers is shared with other macrophage populations. *Cd4* mRNA expression was shared uniquely  
343 with lung, skin and kidney macrophage subpopulations (see **Figure 2B**). A third dataset tracks the  
344 adaptation of transferred blood monocytes to the intestinal niche [95]. Cluster 38 identified *Cxcr4* as a  
345 candidate intestinal macrophage marker consistent with their continuous derivation from CXCR4<sup>+</sup>  
346 monocytes. The high expression of *Wnt4* in lamina propria macrophages was recently confirmed by  
347 IHC. Conditional deletion of *Wnt4* using *Itgax-cre* led to dysregulation of immunity against an intestinal  
348 parasite [96]. WNT4 is a candidate mediator of the key trophic role of lamina propria macrophages in  
349 the intestinal stem cell niche [97]. *Fosb*, *Hes1* and *Hic1* encode identified potential transcriptional  
350 regulators of intestinal macrophage differentiation and adaptation. HES1 inhibits inflammatory  
351 responses in macrophages and contributes to gut homeostasis [98, 99]. FOSB has not previously been  
352 implicated in macrophage adaptation to any niche. Unfortunately, we were not able to include data from

353 a microarray analysis of resident colonic macrophages which identified a set of 108 genes >2-fold higher  
354 in the colon relative to other macrophage populations in the ImmGen database [100]. However, Cluster  
355 38 confirmed the gut macrophage-specific expression of several of these transcripts including *DnaI13*,  
356 *Fgl2*, *Gpr31b*, *Hes1*, *Mmp13*, *Ocstamp*, *Pgf* and *Tlr12*.

357 There were no unique expression profiles enriched in macrophages isolated from any other major tissues  
358 including adipose, brain (non-microglia), heart, kidney, pancreas or skin. The abundant resident  
359 macrophages of adipose are especially topical in light of the obesity epidemic. The literature on adipose  
360 macrophages focusses on “M2-like” markers [101]. Amongst resident macrophage populations, *ApoE*  
361 and *Retnla*, both detected in most tissue macrophages and not included in a cluster, were highest in  
362 adipose-derived macrophages. RETNLA (aka RELM $\alpha$ ) has been referred to as an adipokine, regulated  
363 by food intake and controlling lipid homeostasis [102]. Kumamoto *et al.* [103] claimed that *Retnla* was  
364 co-expressed with *Mgl2* (another putative M2 marker) in many mouse tissues including adipose and  
365 attributed it a role in maintenance of energy balance. The two transcripts were not correlated in this  
366 larger dataset. In fact, *Mgl2* was part of a small cluster (Cluster 83) with *Cd14*. Like *Retnla*, mRNA  
367 for the related lectin, MGL1 (*Clec10a* gene), also considered an M2 macrophage marker [101] was  
368 highest in the adipose-associated macrophages but also expressed in macrophages from other tissues  
369 including dura, heart, lung and skin (Cluster 101).

### 370 **Dendritic cell co-expression clusters**

371 Despite evidence that it is expressed by many resident tissue macrophages (reviewed in [24]), CD11C  
372 (ITGAX) is still widely-used as a surface marker in mouse DC purification. Ongoing studies of the  
373 impacts of conditional mutations using *Itgax*-cre continue to be interpreted solely in terms of DC  
374 specificity (e.g. [96, 104, 105]). Consistent with the literature, *Itgax* was expressed in multiple  
375 macrophage populations (**Figure 2A**) at levels at least as high as in purified DC, and correlated only  
376 with *Cd22*, *Cd274* (encoding PD-L1), *Csf2rb*, *Csf2rb2*, *Slc15a3*, *Tmem132a* and the transcription factor  
377 gene *Prdm1* (Cluster145). Class II MHC is also commonly used as a marker to purify DC and expression  
378 is obviously a prerequisite for antigen presentation to T cells. The ImmGen consortium compared DC  
379 from multiple sources with various macrophage populations to identify transcripts that distinguish DC

380 from macrophages [26, 27]. Since the macrophages used for comparison were MHCII<sup>lo</sup>, the DC  
381 signature included class II MHC genes. In our meta-analysis, one small cluster (Cluster 165) contained  
382 the transcription factor gene *Ciita* and its targets *Cd74*, *H2-Aa*, *H2Ab1*, *H2-DMa/b1*, *H2-Eb1*. The genes  
383 in this cluster were clearly highly-expressed in many tissue macrophages, (see profile for *Cd74* in **Figure**  
384 **2A**) but regulated independently of any other markers and expressed no higher in cells annotated as DC  
385 than in cells annotated as macrophages from intestine, lung, heart and kidney. Interestingly, again  
386 highlighting the issue with a definition of DC based upon unique APC function, isolated lung MHCII<sup>hi</sup>  
387 interstitial macrophages were as active as cDC2 in antigen-presentation assays *in vitro* [25].

388 The GCN analysis did identify three separate DC-associated co-expression clusters that are consistent  
389 with current knowledge of putative DC subsets and adaptation in mice [20, 21, 106]. Cluster 13 includes  
390 *Ccr7* and transcription factors *Spib* and *Stat4*, Cluster 28 includes *Flt3*, *Kit* and the transcription factor  
391 *Relb* and Cluster 49 includes cDC1 markers *Itgae* (CD103) and *Xcr1*. CCR7 is associated with DC  
392 migration [107] and the transcript was abundant in both cDC1 and cDC2 isolated from spleen and lymph  
393 node (LN). By contrast, the expression was much lower in isolated lung DC and in kidney DC from a  
394 separate dataset (see below), similar to levels in isolated macrophages from multiple tissues. Several  
395 putative DC markers were excluded from DC-specific clusters. The transcription factor gene *Batf3*,  
396 implicated in cDC1 differentiation [108] did not form part of a cluster and was detected in most  
397 macrophage populations (consistent with [15]). Similarly, IRF4 has been attributed a specific function  
398 in cDC2 differentiation [105]. *Irf4* mRNA was more abundant in cDC2 compared to cDC1 but was also  
399 expressed in monocytes and monocyte-derived macrophage populations. Transcripts encoding NFIL3  
400 and IRF8, which interact in the regulation of cDC1 differentiation [109] were also highly-expressed in  
401 cDC2 and in monocytes and many tissue macrophages. Although the transcription repressor gene  
402 *Zbtb46*, encoding a putative DC lineage marker [110] was highest in DC it was also detectable in most  
403 isolated tissue macrophages, notably in kidney and lung. Another putative DC marker gene, *Clec9a*  
404 [111] also clustered independently because of expression in isolated intestine, kidney, liver and lung  
405 macrophages.



406 Interestingly, tissue macrophages may contribute to homeostatic regulation of cDC differentiation. The  
407 transcript encoding the FLT3 ligand (*Flt3l*) was expressed constitutively to varying degrees in all of the  
408 MPS populations studied. Fujita *et al.* [104] showed that FLT3L is cleaved from the cell surface of  
409 expressing cells by ADAM10. Conditional deletion of *Adam10* using *Itgax-cre* led to reduced  
410 differentiation of cDC2. *Adam10* is also expressed by CD11C<sup>+</sup> macrophages; it forms part of Cluster 3,  
411 low in monocytes and expressed by all resident macrophages at higher levels than in DC.

412 Aside from CLEC9A, many other lectin-like receptors have been proposed as DC markers and inferred  
413 to have a function in antigen uptake. **Figure 5** shows the profiles for the 12 members of the so-called  
414 dendritic cell immunoreceptor (DCIR) family. The original member of this family, *Clec4a2*, the likely  
415 ortholog of the single *CLEC4A* gene in humans, encodes a lectin with a broad binding specificity for  
416 mannose and fucose [112]. Studies on knockout mice lacking *Clec4a2* continue to be based upon the  
417 claim that the lectin is mainly expressed by DC [113] but the global analysis showed that it is more  
418 highly-expressed in most isolated macrophage populations. Two of the DC-associated clusters contained  
419 other members of the family, *Clec4a4* and *Clec4b2*. *Clec4a4* has been attributed a specific role in cDC1  
420 dendritic cell function [114] but it was equally expressed in cDC2 and forms part of Cluster 28. Most of  
421 the *Clec4* genes in the mouse genome are in a single location on Chromosome 6. They also include  
422 macrophage-inducible C-type lectin (Mincle) encoded by *Clec4e*, which mediates innate immune  
423 responses to *Candida* [115]. The related *Clec4f* (Kupffer cell marker) and *Cd207* (langerin) are located  
424 together in a separate locus on Chromosome 6. Each of the *Clec4* genes had a unique expression profile  
425 in tissue macrophage populations. Analysis of the entire dataset reveals that “DCIR” is a misnomer for  
426 this family. The DC designation has also been misapplied to other putative markers, including DC-SIGN  
427 (*CD209* in humans), DEC205 (*Ly75*) and DC-HIL (*Gpnmb*). In mice there are multiple *Cd209* paralogs.  
428 *Cd209b* was highly-expressed in marginal zone macrophage populations in spleen and is *Csf1r*-  
429 dependent [61]. These cells have not been successfully isolated by tissue disaggregation. Four members  
430 of the CD209 family (*Cd209a,d,f,g*) were co-expressed in a unique pattern (Cluster 100) together with  
431 *Cbr2*, *Ccl24* and *Clec10a*. *Ly75* was detected in both cDC subpopulations but was most highly-  
432 expressed in lung macrophages (Cluster 10).

433 CD64 was used as an exclusion criterion to remove or separate macrophages from DC or to enrich  
434 macrophages in all of the datasets included herein based upon the earlier studies of the ImmGen  
435 Consortium [26]. This exclusion was clearly successful in that all the purified DC have very low *Fcgr1*  
436 (**Figure 2A** and **Table S1**), but the expression of this gene in macrophage populations was also highly  
437 variable. As a simple screen for additional markers that distinguish all “macrophages” from all “DC”,  
438 we averaged expression across all macrophage and DC samples and compared them (see **Table S1**).  
439 Amongst the transcripts that were robustly-expressed and highly-enriched in macrophages to at least the  
440 same extent as *Fcgr1*, those encoding surface markers were also variably-expressed amongst  
441 macrophage populations. However, we identified three transcription factor genes, *Cebpb*, *Mafb* and  
442 *Klf10*, that were apparently excluded from all of the cDC. The role of *Cebpb* in macrophage  
443 differentiation is well-recognised [116-118] and one of the datasets includes progenitors from *Cebpb*<sup>-/-</sup>  
444 mice [118]. There is evidence of a negative feedback relationship with *Irf8* in monocyte-derived DC  
445 [119]. *Cebpb* was detected in most tissue macrophages but uniquely excluded from some populations,  
446 notably the heart and intestinal muscularis. *Mafb* has been proposed previously as a lineage marker  
447 separating macrophages from DC [120, 121]. The literature on *Klf10* is more limited, with evidence that  
448 it participates in TGFβ-induced macrophage differentiation [122].

#### 449 **Resident macrophage activation during isolation**

450 Cluster 41 contains numerous immediate early genes (IEG) encoding transcription factors and feedback  
451 regulators (e.g. *Fos*, *Egr1*, *Dusp1*) consistent with evidence that isolation of cells from tissues produces  
452 cell activation, from single cell sequencing of disaggregated cells [123, 124]. In many samples, IEG  
453 were amongst the most highly-expressed transcripts. The majority of isolated macrophage populations  
454 also had high levels of macrophage-specific LPS-inducible genes. Cluster 224 contains *Ccl2*, *Ccl7*,  
455 *Ccl12*, *Cxcl1* and *Il6*, Cluster 329 includes *Il1b* and *Ptgs2* (*Cox2*), and Cluster 485 contains *Tnf* and  
456 inducible chemokines *Ccl3* and *Ccl4*. The anti-inflammatory cytokine *Il10*, which is also LPS-inducible,  
457 formed part of the intestinal macrophage cluster (Cluster 38). IL10 is essential to intestinal homeostasis  
458 [80] but *Il10* mRNA was detected in only one of the three intestinal macrophage datasets [34] alongside  
459 very high expression of IEG and proinflammatory cytokines (e.g. *Il1b*, *Tnf*). Inflammation-associated

460 transcripts were highlighted as evidence of activation *in vivo* in sensory neuron-associated macrophages  
461 [125]. Similarly, Chakarov *et al.*[25] highlighted selective expression of *Il10* in interstitial lung  
462 macrophages, and differential expression in the LYVE1<sup>hi</sup>/MHCII<sup>lo</sup> subpopulation. They did not  
463 comment upon the reciprocal pattern observed with *Tnf* and *Ilb*, both more highly-expressed in the  
464 LYVE1<sup>lo</sup> macrophages. Both populations of interstitial lung macrophages (and all the samples from  
465 other tissues in this BioProject) expressed very high levels of all of the IEG transcripts in Cluster 41.  
466 Whereas macrophage-expressed transcripts such as *Adgre1* are readily detected in total tissue mRNA,  
467 and are CSF1R-dependent, inflammatory cytokines and IEG transcripts are not [16,61]. Accordingly,  
468 in each of these studies, the expression of IEG and inducible cytokines is most likely an artefact of tissue  
469 disaggregation. Consistent with that conclusion, the clear exception in which IEG were not detected is  
470 peritoneal macrophages, which are not subjected to the stress of enzymic digestion during isolation.

471 Interestingly, *Acod1*, which was massively-induced within 1 hour by LPS in mouse macrophages *in*  
472 *vitro* (see <http://biogps.org>) was only detected at low levels in a small subset of samples and not  
473 correlated with IEG or any other inflammatory activation markers. Induction of this gene has attributed  
474 functions in adaptive immunometabolism and accumulation of TCA cycle intermediates in activated  
475 macrophages [126]. The lack of detection in the isolated macrophages suggests either that induction is  
476 specific to recruited inflammatory macrophages or that inducible expression is purely an *in vitro*  
477 phenomenon. The *Acod1* expression pattern was correlated only with *Il23a* (encoding a subunit of the  
478 cytokine IL23) at the stringency used here ( $r \geq 0.75$ ).

#### 479 **Contamination of macrophage populations with other cell types.**

480 **Table 3** and **Figure 4B** highlight other clusters that were tissue-specific and contained markers and  
481 transcription factors associated with organ/tissue-specific differentiation, with corresponding  
482 enrichment for GO terms associated with specific tissues (**Table S2**). There are three ways in which  
483 mRNA from purified macrophage/DC populations may be contaminated with mRNA from unrelated  
484 cells. The most straightforward is poor separation of macrophages from unrelated contaminating cells  
485 by FACS for purely technical reasons. A second source derives from active phagocytosis by  
486 macrophages of senescent cells, where RNA from the engulfed cell may be detected. Finally, there is a

487 phenomenon that arises from the extensive ramification of macrophages and their intimate interactions  
488 with other cells. Gray *et al.* [127] found that cells purified from lymph nodes with the surface marker  
489 CD169 were in fact lymphocytes coated with blebs of macrophage membrane and cytoplasm. Similarly,  
490 Lynch *et al.* [128] found that all methods to isolate Kupffer cells (KC) for flow cytometry produced  
491 significant contamination with CD31<sup>+</sup> endothelium tightly adhered to remnants of KC membrane.

492 Cluster 2 appears to be generic “rubbish” cluster, containing transcripts detected at relatively low levels  
493 only in specific BioProjects and unrelated to tissue of origin. Other clusters were driven by a single  
494 RNA-seq result from within one BioProject. These clusters most likely represent technical noise as well  
495 as contamination.

496 Consistent with the proposal from Lynch *et al.* [128] three endothelial-associated transcripts, *Cdh5*,  
497 *Pecam1* and *Stab 2*, were contained with the KC-enriched cluster (Cluster 12) and apparently increased  
498 in expression during KC differentiation. However, other endothelial transcripts were. Bonnardel *et al.*  
499 [129] generated RNA-seq data from purified liver sinusoidal endothelial cells (EC). We examined the  
500 profiles of the most highly-expressed EC genes in the macrophage dataset. Many of them were  
501 detectable in isolated KC but at much lower levels than *Cdh5*, *Pecam1* and *Stab2*. They contributed to  
502 a separate liver-specific endothelial cluster (Cluster 76). So, whilst there is evidence that EC contaminate  
503 KC preparations reflecting the close apposition in the sinusoids, *Cdh5*, *Pecam1* and *Stab2* are likely also  
504 genuine KC-expressed transcripts.

505 The detection of mature red cell transcripts encoding haemoglobin (*Hba*, *Hbb*), which are quite abundant  
506 in many macrophage populations, most likely reflects ongoing erythrophagocytosis. Macrophages  
507 isolated from the intestinal lamina propria in one of the two large datasets from small intestine [33] were  
508 heavily contaminated with markers of intestinal epithelium (Clusters 5/17). This might be a separation  
509 artefact but could also reflect an active role of macrophages in clearance of senescent epithelial cells  
510 [80]. Cluster 18 and Cluster 45 were restricted to samples from a study of pancreatic islet and peri-islet  
511 macrophage populations [130]. The authors noted the expression of insulin (*Ins1*) mRNA in their islet  
512 macrophage populations and attributed it to an intimate interaction with  $\beta$ -cells. Contamination or  $\beta$ -  
513 cell-macrophage fusion was said to be excluded on the basis that  $\beta$ -cell markers such as *Pdx1* were not

514 detected. However, many other islet-associated transcripts were abundant and formed part of Cluster  
515 18, notably transcription factors *Isl1*, *Foxa2*, *Nkx6.1*, *Nkx2.2* and other abundant islet-specific  
516 transcripts, *Inhba*, *Chga/b*, *Iapp*, *Gipr* and *Gcg*. Similarly, Cluster 45 was relatively enriched in the peri-  
517 islet macrophages and contains transcripts encoding many pancreatic enzymes. Cluster 65 includes  
518 *Acta2* and other smooth muscle markers which selectively contaminated macrophages isolated from the  
519 intestinal muscularis [33].

520 The bone marrow contains several populations of macrophages [29] including those associated with  
521 hematopoietic islands expressing CD169 (*Siglec1* gene) and VCAM1. One of the datasets included in  
522 the present study profiled the transcriptome of macrophages associated with erythroblastic islands, based  
523 upon isolation using an *Epor*-EGFP reporter gene [131]. A second bone marrow dataset separated  
524 macrophages based upon their engagement in phagocytosis of blood-borne material [132]. The putative  
525 erythroblastic island macrophages did not actually express increased *Epor* mRNA (although *Epor* was  
526 detected in other macrophage populations as reported recently [68] and fell within the Cluster 22).  
527 However, in the isolated bone marrow macrophages, *Siglec1* was correlated with high levels of both  
528 immature neutrophil (Cluster 32) and erythroid-associated (Cluster 33) mRNAs. The separation of these  
529 two clusters implies that the contamination occurs in distinct macrophage populations, enriched  
530 selectively in each preparation and perhaps derived from separate hematopoietic islands [29]. Cluster  
531 32 also contains the myeloid progenitor transcription factor *Myb* and the GM-progenitor marker *Ms4a3*.  
532 Given the extensive ramification of marrow macrophages and their intimate interactions with  
533 progenitors [29], this contamination likely reflects the same isolation artefact reported in lymph node  
534 [127], namely haemopoietic progenitor cells cloaked in macrophage clothing.

535 There are separate clusters including B cell and NK cell-specific markers. The B cell cluster, Cluster  
536 87, shows highest average expression in intestine, bone marrow, lung and spleen and likely reflects close  
537 association between macrophages and B cells in lamina propria and germinal centres [33]. The cluster  
538 containing NK cell markers, Cluster 67, had highest average expression in one of the DC preparations.  
539 Those DC came from a study that proposed a further subdivision of cDC2 based upon expression of  
540 transcription factors T-bet (*Tbx21*) and ROR $\gamma$ T [133] and separated cDC2 based upon expression of a

541 *Tbx21* reporter allele. *Tbx21* was detected in all purified splenic cDC preparations presented on  
542 <http://biogps.org>, but at much lower levels than in NK cells. NK cells also express *Itgax*, used in  
543 purification of the cDC. Accordingly, it seems likely that apparent *Tbx21* expression in DC is due to  
544 NK cell contamination.

#### 545 **Clustering of transcription factor (TF) expression**

546 Most of the co-regulated clusters identified above contain genes encoding transcriptional regulators that  
547 are known to be essential for tissue-specific adaptation. These represent only a small subset of the  
548 transcriptional factors detected in MPS cells. The  $r$  value of 0.75 was chosen empirically for the analysis  
549 of the whole dataset to maximise the number of genes included while minimizing the number of edges  
550 between them (**Figure S1**) and aimed at assessing the predictive value of markers including those shown  
551 in **Figure 2**. To test the effect of reducing the stringency we focused on annotated transcription factors  
552 [134] to reduce the complexity and remove noise. 1103 transcriptional regulators were detected above  
553 the 10 TPM threshold in at least one macrophage population. The sample-to-sample matrix (**Figure 6**)  
554 shows that populations sourced from different tissues could be distinguished based upon TF expression  
555 alone. It also shows that TF expression in the DC populations was similar to that in macrophage cells.  
556 We generated GCN at three different Pearson correlation coefficient thresholds, 0.5, 0.6 and 0.7. The  
557 results are provided in **Table S3**. As the cut-off was reduced, more TF transcripts were included in the  
558 network. At the highest stringency  $r$  value  $\geq 0.7$ , the largest cluster includes *Spi1* alongside many of the  
559 transcription factors identified in the largest generic MPS co-expression clusters above (Clusters 1, 3  
560 and 4). We conclude that the basic shared identity of MPS cells involves coordinated expression of  
561 around 100-150 transcription factors. Even at the lowest  $r$  value ( $\geq 0.5$ ), transcription factor genes  
562 identified as specific to particular tissue-specific MPS populations made few additional connections,  
563 indicating that local adaptation is dependent on highly-correlated and regulated expression of a small  
564 cohort of TF. Nevertheless, associations that become evident at lower  $r$  value may identify combinatorial  
565 interactions in particular cell populations; *Mycl*, associated with DC fitness ([135] was weakly-  
566 correlated with *Irf8* and *Zbtb46*; *Cebpb* with *Nfil3* and interferon-related transcription factors (*Batf2*,  
567 *Irf1/7/9*, *Stat1/2*) were connected at the threshold of 0.5 (**Table S3**).

568 **Expression of solute carriers and metabolism genes in macrophage populations.**

569 The burgeoning field of immunometabolism has focused on regulation of intermediary metabolism in  
570 recruited monocytes and macrophages in various states of activation or polarization [126]. Amongst  
571 emerging concepts is the view that M1 polarization (classical activation) is associated with aerobic  
572 glycolysis and mitochondrial dysfunction, whereas M2 polarization requires an active tricarboxylic acid  
573 cycle [126]. Cluster 7 contains mitochondria-associated transcripts and transcripts encoding ribosomal  
574 subunits, with variable expression across all samples, even from the same tissue, indicating the resident  
575 tissue macrophages vary in their dependence upon mitochondrial oxidative phosphorylation irrespective  
576 of surface markers or differentiation state.

577 In many cases metabolic pathways are regulated at the level of solute transport [126]. There were > 400  
578 members of the large solute carrier (SLC) family expressed in mononuclear phagocytes above the 10  
579 TPM threshold. Some were more highly expressed in intestine and kidney epithelial cells and clustered  
580 with tissue-specific epithelial markers. However, many contributed to macrophage-enriched expression  
581 clusters. One such gene, *Slco2b1*, which encodes an organic anion transporter of unknown function, has  
582 been proposed as a marker gene to distinguish macrophages from DC subsets and the promoter was used  
583 in an inducible macrophage depletion strategy [25]. The larger dataset does not support this dichotomy.  
584 *Slco2b1* is part of Cluster 4, enriched in microglia and absent from multiple other macrophage  
585 populations as well as both cDC subsets.

586 Macrophages depend to varying degrees upon glutamine, glucose and fatty acids as fuels [136] and  
587 glutamine is an important immune regulator [137]. 14 different solute carriers from 4 families have been  
588 shown to transport glutamine [138]. Of the genes encoding these carriers, *Slc38a1* was widely expressed  
589 in MPS cells and did not fall within a cluster, whereas *Slc7a5*, *Slc7a7*, *Slc7a8* and *Slc38a7* were part of  
590 distinct macrophage-enriched clusters. Consistent with the importance of glutamine as a fuel for MPS  
591 cells, transcripts encoding enzymes of glutamine metabolism (*Gls*, *Glud1*, *Glul*, *Slc25a11*) were also  
592 highly-expressed and part of Clusters 1 and 3. By contrast, resident MPS cells apparently have limited  
593 expression of glucose transporters. *Slc2a1* (encoding glucose transporter GLUT1) was low, highly  
594 variable and idiosyncratic amongst tissues. A myeloid-specific conditional knockout of *Slc2a1*

595 confirmed that GLUT1 is the major glucose transporter in macrophages but the loss of glucose as a fuel  
596 had remarkably little impact on macrophage function [139]. The expression of *Slc2a1* in cells isolated  
597 from tissues is difficult to interpret since the transporter is induced by hypoxia [140], which might arise  
598 during isolation, and *Slc2a1* was barely detectable in peritoneal macrophages, which are less likely to  
599 undergo stress during isolation. In the absence of *Slc2a1*, macrophages increase oxidation of fatty acids  
600 [139]. The *Slc27a1* gene, encoding the fatty acid transporter FATP1 which also contributes to functional  
601 regulation in macrophages [141, 142], was widely-expressed in tissue macrophages and, with carnitine  
602 acyl transferase genes (*Crat*, *Crot*), formed part of Cluster 1. *Slc2a5* (found in Cluster 4) encodes a  
603 fructose-specific transporter [143] and was expressed primarily in microglia. *Slc2a6* is a lysosome-  
604 associated glucose transporter that was recently knocked out in the mouse genome [144]. It also has a  
605 novel expression profile being highest in monocytes and cDC2.

606 One of the best known functional solute carriers in macrophages is natural resistance associated  
607 membrane protein 1 (NRAMP1; *Slc11a1* gene), which is associated with genetic resistance to  
608 intracellular pathogens. SLC11A1/NRAMP1 is expressed in lysosomes and contributes to pathogen  
609 resistance by restricting available iron [145]. The role in iron metabolism is reflected by its presence in  
610 Cluster 12, alongside *Slc40a1*, encoding ferroportin, the macrophage-enriched iron exporter [146]. One  
611 other prominent class of solute carriers highly expressed in macrophages (*Slc30a6*, *Slc30a7*, *Slc30a9*;  
612 *Slc39a3*, *Slc39a7*, *Slc39a9* in Cluster 1; *Slc39a12* in Cluster 4) is involved in transport of zinc, which is  
613 a component of antimicrobial defense [147, 148]. Two further zinc transporters, *Slc39a2* and *Slc39a11*,  
614 were enriched in lung macrophages (Cluster 10). This lung macrophage-enriched cluster also contains  
615 *Slc52a3*, encoding a riboflavin transporter, *Slc6a4* (sodium and chloride dependent sodium symporter)  
616 and 2 members of the Slc9 family of sodium-hydrogen exchange (NHE) transporters (*Slc9a4* and  
617 *Slc9a7*) which are more traditionally associated with epithelial function [149].

#### 618 **Validation of co-expression clustering with an independent kidney dataset.**

619 The abundant macrophage populations of the kidney were first described in detail using F4/80 as a  
620 marker *in situ* [150]. There has been considerable debate about the relationships between resident  
621 macrophages, monocyte-derived macrophages and cDC subsets in the kidney [151]. The main cluster



622 analysis did not reveal a separate kidney resident macrophage-enriched profile. The kidney dataset in  
623 the analysis included F4/80<sup>+</sup>, CD64<sup>+</sup> macrophages isolated from control and ischemic kidneys, further  
624 subdivided based upon expression of CD11B and CD11C [152]. Salei *et al.* [111] recently produced  
625 RNA-seq data for isolated populations of resident macrophages, monocyte-derived cells, cDC1 and  
626 cDC2 from kidney compared to similar populations from spleen. The primary data were not available  
627 for download by our automated pipeline through the ENA at the time we pooled and froze our dataset  
628 (February 2020). We therefore obtained the processed data directly from the authors and carried out  
629 network analysis using the 33 samples and 9,795 genes with normalized expression of at least 10 in at  
630 least one sample. The macrophages of the kidney are intimately associated with the capillaries [153] but  
631 *Lyve1* was not detectable in resident macrophages in this dataset or in [152]. Published IHC on mouse  
632 kidney reveals that LYVE1 is restricted to lymphatic vessels [154].

633 **Figure 7** illustrates the way in which the sample-to-sample matrix revealed relationships between the  
634 cell populations with increasing correlation coefficient threshold. Even at the lowest correlation cut-  
635 off, used in the main atlas (0.75), the splenic red pulp macrophages separated from all kidney and DC  
636 samples. As the cut-off was made more stringent, the cDC1 from both spleen and kidney separated, but  
637 the resident kidney macrophages, cDC2 and monocyte-derived macrophages remained closely  
638 connected until  $r \geq 0.98$  when the spleen cDC2 separated from the monocyte-derived macrophages and  
639 kidney cDC2. At  $r \geq 0.99$  the kidney cDC2 and monocyte-derived macrophages were still not separated  
640 indicating that the expression profiles of these cell types are very similar. Salei *et al.* [111] performed  
641 a principal components analysis based upon the 500 most variable transcripts and also identified the  
642 close relationship between cDC2 and monocyte-derived cells. Our analysis further emphasizes their  
643 conclusion that the main axis of difference is between spleen macrophages and all other cells. cDC1  
644 from both tissues were more similar to each other than to the other cells but spleen cDC2 were only  
645 separated from kidney cDC2 and monocyte derived macrophages at the highest stringencies. We also  
646 performed a gene-to-gene analysis on these data. The profiles of kidney myeloid cells other than cDC1  
647 were very similar and differed by only a small number of genes. Consistent with this conclusion, the  
648 two largest clusters in this analysis (see **Table S4**) were shared between all of the isolated populations

649 and contain *Spil* as well as many of the DC-enriched markers identified in the main analysis. However,  
650 *Ccr7* and many of the genes associated with it in the main dataset (Cluster 13, **Table 2**; e.g. *Spib*, *Stat4*,  
651 *Vsig10*, *Cd200*, *Itgb8*) were expressed at low levels in isolated kidney DC as in lung DC. Cluster 3 of  
652 the kidney analysis was specific to splenic red pulp macrophages and contains the known transcriptional  
653 regulators *Pparg*, *Spic* and *Nr1h3*. Transcripts in Cluster 4 were enriched in the resident kidney  
654 macrophages compared to both splenic macrophages and other kidney myeloid populations.  
655 Interestingly, the resident kidney macrophage cluster includes many genes that are also highly-expressed  
656 in microglia and depleted in the brain in *Csf1r* mutant mice and rats, including *Cx3cr1*, *C1qa/b/c*, *Csf3r*,  
657 *Ctss*, *Fcrls*, *Hexb*, *Laptm5*, *Tgfbr1*, *Tmem119* and *Trem2* [16, 61]. These were also detected in the  
658 isolated kidney macrophages in **Table S1**. Both microglia and resident F4/80<sup>hi</sup> kidney macrophages are  
659 selectively lost in a mouse line with a mutation in a conserved enhancer of the *Csf1r* locus [16]. *Runx1*,  
660 which regulates the activity of the *Csf1r* enhancer [155] and has also been implicated in the  
661 establishment of microglial cells during development [156] was within this cluster. *Csf1r* mRNA was  
662 expressed at high levels in cells defined as cDC2 as well as monocyte-derived cells and resident  
663 macrophages. All cells expressing a *Csf1r*-EGFP reporter in the kidney were depleted by treatment with  
664 anti-CSF1R antibody[30]. This suggests that despite their expression of FLT3, renal cDC2 are CSF1R-  
665 dependent. Cluster 6 of the kidney analysis, including *Itgam*, was enriched in the selected CD11B<sup>+</sup>  
666 populations from kidney but highly-expressed in all of the populations. This cluster includes all of the  
667 co-regulated immediate early genes identified in Cluster 41 in the extended MPS dataset above,  
668 suggesting that recent monocyte-derived cells may be more susceptible to activation during isolation.

### 669 **The relationship between single cell and bulk RNA-seq data**

670 The advent of scRNA-seq has been heralded as a revolution promising new approaches to classification  
671 of myeloid heterogeneity [35, 157, 158]. Single cell (sc) RNA-seq is intrinsically noisy, non-quantitative  
672 stochastic sampling of a subset of the most abundant mRNAs in individual cells ([159, 160]).  
673 Algorithms that support non-linear dimensional reduction (e.g. *t*-distributed stochastic neighbour  
674 embedding [*t*-SNE] or Uniform Manifold Approximation and Projection (UMAP)) [161] followed by  
675 some form of clustering are then used to join together groups of cells in which the members share

676 detection of an arbitrarily-defined set of markers. There is an implicit assumption in this approach that  
677 defined cell types, with approximately identical transcriptomes, actually exist and that sampling noise  
678 can be overcome by pooling the transcripts detected in a sufficiently large number of cells to create  
679 meta-cells. Based upon scRNA-seq analysis of interstitial lung macrophages, Chakarov *et al.*[25]  
680 inferred the existence of a subpopulation that expressed LYVE1. They then generated bulk RNA-seq  
681 data from separated LYVE1<sup>hi</sup> and LYVE1<sup>lo</sup> subpopulations. Their data allow a critical comparison of  
682 the two approaches. For this purpose, the primary scRNA-seq data were downloaded, reanalysed and  
683 expressed as TPM using the Kallisto pseudoaligner. **Table S5** contains these reprocessed data, alongside  
684 the bulk RNA-seq data for the lung macrophage subpopulations, with the level of expression ranked  
685 based upon the bulk RNA-seq data for the purified LYVE1<sup>hi</sup> interstitial macrophages.

686 Consistent with Zipf's law, the power-law distribution of transcript abundance [162, 163], the top 200  
687 expressed transcripts in the bulk RNA-seq data contribute around 50% of the total detected transcripts  
688 in the scRNA-seq data and it is clear that these are the only transcripts detected reliably (**Table S5**). The  
689 abundant transcripts from bulk RNA-seq that are also detected in scRNA-seq samples include many cell  
690 type-specific surface markers which explains the ability to use scRNA-seq to discover such markers.  
691 These abundant transcripts also include IEG such as *Dusp1*, *Egr1*, *Fos*, *Ier2* and *Junb*, indicative of the  
692 activation that occurs during isolation as discussed above. The inducible cytokines including *Ccl2*, *Tnf*,  
693 *Il1b*, *Il6* and *Il10* were each detected in a subset of the cells. Of the most highly-expressed transcripts  
694 only a very small subset (e.g. *Actb*, *ApoE*, *B2m*, *Ccl6*, *Cd74*, *Ctsb*, *Fth1*, *Ftl1*, *Lyz2*) had non-zero values  
695 in all cells. The average expression of the top 500 transcripts in the single cells was similar to the bulk  
696 RNA-seq but the detected expression level varied over 4 orders of magnitude among individual cells.  
697 *Fcgr1* and *Mertk* mRNAs, encoding markers used to purify the interstitial macrophages for scRNA-seq,  
698 were actually detected in only a small subset of the cells and were not correlated with each other. Both  
699 this study and a subsequent study [50] state that *Mrc1* and *Lyve1* expression is shared by overlapping  
700 populations of lung interstitial macrophages. That conclusion is not supported by the data. The  
701 separation of these two markers was evident from the separate study of lung interstitial macrophage  
702 populations [164] included in our analysis and has been discussed above. Even in the bulk RNA-seq

703 data from lung interstitial macrophages, the expression of *Mrc1* was only marginally-enriched in  
704 purified LYVE1<sup>hi</sup> cells relative to LYVE1<sup>lo</sup> cells (**Table S1**). Consistent with that conclusion, in the  
705 scRNA-seq data the two are not strictly correlated with each other, with *Mrc1* being detected in many  
706 more cells than *Lyve1* (**Figure 8A**) despite similar absolute levels of expression in the total RNA-seq  
707 data.

708 To identify whether any robust correlations actually exist in the scRNA-seq data, the top 500 expressed  
709 transcripts in the scRNA-seq samples were used for network analysis. The sample-to-sample network  
710 ( $r \geq 0.53$ ) is shown in **Figure 8B** and the gene-to-gene network ( $r \geq 0.5$ ) in **Figure 8C**. The cluster list and  
711 average expression profiles are provided in **Table S6**. One clear-cut finding is the co-expression of  
712 genes involved in APC activity (*H2-Aa*, *H2-Ab1*, *H2-Eb1*, *Cd74* and *Ctss*; Cluster 13 of the scRNA-seq  
713 analysis), which were effectively present or absent in individual cells. Chakarov *et al.* [25] defined two  
714 subpopulations as LYVE1<sup>hi</sup>/MHCII<sup>lo</sup> and LYVE1<sup>lo</sup>/MHCII<sup>hi</sup> but only six of the scRNA-seq samples  
715 expressed *Lyve1* and half of those also expressed MHC II genes (**Figure 8A**). This is consistent with  
716 the lack of any inverse correlation between *Lyve1* and *Cd74* in **Figure 2B**. Even at this low  $r$  value  
717 known highly-expressed markers segregated from each other. *Lyve1* forms a cluster with *Mgl2*, *Cd209*  
718 and *Cd302* (Cluster 7 in the scRNA-seq analysis; **Figure 8C**). *Adgre1* is in a co-expression cluster that  
719 includes *Lyz2* and *Msr1* (Cluster 4 of the scRNA-seq analysis), *Csflr* is co-expressed with *Mrc1* and  
720 *Cd163* (Cluster 2) and *Lgals3* with *Retnla* and *Fcrls* (Cluster 1). The co-regulation of MHC-related  
721 genes, and genes located in the same chromosomal region (e.g. *Clqa*, *Clqb*, *Clqc*; Cluster 25 of the  
722 scRNA-seq analysis) as well as the relatively uniform detection of genes such as *Actb* (**Figure 8A**)  
723 suggest that a significant proportion of the all-or-nothing differences in expression between cells in the  
724 scRNA-seq data is real.

## 725 **Implications of transcriptional network analysis for the utility of surface markers**

726 As discussed in the previous section, scRNA-seq provides an ambiguous view of cellular heterogeneity.  
727 Non-linear dimensionality reduction algorithms can hide or emphasise diversity by grouping cells in  
728 which an overlapping set of markers is detected. The number of populations defined depends upon the  
729 parameters applied and different approaches do not always give the same answers [161]. In the lung

730 interstitial population we reanalysed, the detected expression of transcripts encoding plasma membrane  
731 proteins was essentially all-or-nothing. That conclusion may be considered a reflection of the limitations  
732 of the technology, but it is actually supported by other evidence. Tan and Krasnow [165] defined  
733 subpopulations of interstitial lung macrophages based upon expression of F4/80, Mac-2 (*Lgals3*) and  
734 MHCII, and tracked the changes in their relative abundance during development. Interestingly, they did  
735 not detect LYVE1 on adult lung interstitial macrophages by IHC. Consistent with their data, in the  
736 scRNA-seq data most lung interstitial macrophages expressed high levels of either *Adgre1* or *Lgals3*,  
737 but some expressed both or neither. Protein expression at a single cell level clearly does not vary to the  
738 same extent as mRNA since proteins have different rates of turnover and decay [166]. Markers such as  
739 F4/80 and CD11C, and transgenes based upon macrophage-enriched promoters such as *Csflr* and  
740 *Cx3cr1* do appear to label the large majority of MPS cells in most tissues. The disconnect between  
741 scRNA-seq and cell surface markers may partly reflect the nature of transcription. At the single cell  
742 level transcription occurs in pulses interspersed by periods of inactivity and mRNA decay, which can  
743 manifest as random monoallelic transcript expression [167]. If gene expression is genuinely  
744 probabilistic at the level of individual loci [166] the assumption of transcriptomic homogeneity in  
745 definable cell types upon which scRNA-seq analysis is based is clearly invalid. The number of  
746 macrophage subpopulations that can be defined in any scRNA-seq dataset becomes a matter of choice  
747 and model. As an extreme example, one recent scRNA-seq study identified 25 distinct myeloid cell  
748 differentiation “states” in a mouse lung cancer model [168].

749 The RNA-seq data included as representative of cDC subsets [133] was from cells purified using CD64  
750 as a marker to exclude macrophages. Despite this choice, an unbiased assessment of the sample-to-  
751 sample matrix in **Figure 3B** (based on all genes) and **Figure 6** (based on transcription factor genes)  
752 would class all of these DC as part of the same family as macrophages. The use of CD64 as a definitive  
753 marker distinguishing macrophages from DC was criticized when it was proposed [42] and it remains  
754 untenable. It is actually a curious choice as a marker to define a cell as a macrophage since the protein  
755 FCGR1 (CD64) has been implicated functionally in APC activity [169]. From our analysis, the clear  
756 separation of DC from all other members of the MPS based upon APC function, surface markers,

757 transcription factors or ontogeny [20] remains problematic. The one criterion that remains is location.  
758 We suggest that the only defensible definition of a cDC is a mononuclear phagocyte that is adapted  
759 specifically to the T cell areas of secondary lymphoid organs, responding to a specific growth factor  
760 (FLT3L) and the chemokine receptor CCR7. The kidney data [111] suggest that there is also tissue-  
761 specific adaptation of “cDC2” which may remain more “macrophage-like”. In that sense cDC1 and  
762 cDC2 are no more unique than a peritoneal macrophage adapting to signals from retinoic acid via  
763 induction of *Gata6*.

#### 764 **A critical view of markers of macrophage polarization states.**

765 The concept of M1/M2 polarization derives from analysis of classical and alternative activation of  
766 recruited monocytes by Th1 ( $\gamma$ IFN) and Th2 (IL4/IL13) cytokines [74]. Previous meta-analysis indicated  
767 that proposed M2 markers defined by others [74] correlate poorly with each other in isolated  
768 inflammatory macrophages and are not conserved across species [28]. The M1/M2 concept was also  
769 challenged in a recent comparative analysis of *in vitro* and *in vivo* data on macrophage gene expression  
770 [170] which concluded that “valid *in vivo* M1/M2 surface markers remain to be discovered”. We would  
771 suggest that they do not exist. The pro-inflammatory cytokines that we identified as inducible in all the  
772 resident MPS cells during isolation would be considered indicators of M1-like activation. Aside from  
773 proposed M2 markers already mentioned that each have idiosyncratic expression (*Mrc1*, *Retnla*, *Igf1*,  
774 *Mgl2*), *Chil3* (aka *Ym1*) was highly-expressed in lung macrophages (Cluster 10 of the whole dataset  
775 analysis; **Table S2**), *Arg1* and *Alox15* were restricted to peritoneal macrophages (Cluster 21) and *Cd163*  
776 was part of a small cluster of 4 transcripts (Cluster 312). The cluster analysis indicates that the detection  
777 of M2 markers on resident tissue macrophages has little predictive value. Detection of CD206 cannot  
778 imply that the cells have been stimulated with IL4/IL13, nor that they share any functions with  
779 alternatively-activated recruited monocytes. Nevertheless, IL4/IL13/STAT6 signalling could contribute  
780 to resident MPS cell differentiation. The IL13 receptor (*Il13ra*) is part of the generic MPS Cluster 1 and  
781 *Il4ra* is also highly and widely expressed. IL4 administration to mice can drive resident tissue  
782 macrophage proliferation beyond levels controlled homeostatically by CSF1[171].

783 **How do transcriptional networks contribute to understanding macrophage heterogeneity *in situ*?**

784 An important question that arises from the transcriptomic analysis of subpopulations of resident MPS  
785 cells is precisely where are they located and how do they relate to each other? A significant concern  
786 with analysis of the cells isolated by tissue digestion and analysed here is whether recovered cells are  
787 representative of the tissue populations. Analysis of the lung has suggested that interstitial macrophages  
788 are a minority of the lung macrophage population [164]. That conclusion is not compatible with our  
789 own studies visualising *Csf1r* reporter genes, where the stellate interstitial populations are at least as  
790 abundant as alveolar macrophages [48, 49]. The description of subpopulations is not often linked to  
791 precise location with the tissue. One exception is the apparent location of LYVE1<sup>hi</sup> macrophages with  
792 capillaries in the lung [25]. On the other hand, it is unclear where the putative long-lived CD4<sup>+</sup>, TIM4<sup>+</sup>  
793 population in the gut [34] is located. In broad overview, macrophages in every organ, detected with  
794 *Csf1r* reporter transgenes that are expressed in all myeloid cells including DC, have a remarkably regular  
795 and uniform distribution. The concept of a macrophage territory [5] or a niche [172, 173] has been  
796 proposed. But despite their apparent homogeneity in location and morphology, multicolour localisation  
797 of macrophage surface markers suggests that they are almost infinitely heterogeneous (reviewed in [23]).  
798 Most of the datasets analysed here suggest that monocytes and macrophages in each organ are a  
799 differentiation series. We take the view that macrophages in tissues have a defined half-life such that  
800 some cells survive by chance and continue to change their gene expression [5]. Each macrophage that  
801 occupies a new territory, either following infiltration as a monocyte or self-renewal by cell division,  
802 starts a life history that involves changes in gene expression and surface markers with time. In that  
803 view, MPS subpopulations are no more than arbitrary windows within a temporal profile of adaptation.

804 **Conclusion**

805 The transcriptional network analysis confirms that using our unique approach to down-sizing and a  
806 common quantification pathway, the RNA-seq data from different laboratories can be merged to provide  
807 novel insights. The network analysis indicates the power of large datasets to detect sets of co-regulated  
808 transcripts that define metastable states of MPS adaptation and function. The merged dataset we have  
809 created provides a resource for the study of MPS biology that extends and complements resources such

810 as ImmGen (<http://www.immgen.org>). It can be readily expanded to include any new RNA-seq data for  
811 comparative analysis. Clusters of transcripts that are robustly correlated give clear indications of shared  
812 functions and transcriptional regulation. However, our analysis also reveals two important artefacts in  
813 the study of isolated tissue macrophages, the clear evidence of inflammatory activation during isolation  
814 and the extensive contamination of isolated preparations with transcripts derived from other cell types.  
815 A discussion review of MPS heterogeneity in 2010 [174] suggested that in order for the field of  
816 immunology to advance and communicate “all cells have to be called something”. This Linnaean view  
817 continues to drive efforts to classify MPS cells into subsets based upon markers. The analysis we have  
818 presented shows that surface markers are poorly associated with each other and have very limited  
819 predictive value. Aside from MHCII, there are no markers that can be correlated with predicted APC  
820 activity. Resident tissue MPS cells, including cells that are currently defined as DC, belong to a closely-  
821 related family of cells in which the transcriptomic similarities are much greater than the differences. The  
822 cumulative function of the population of MPS cells acting together within each tissue is likely to be  
823 more important to homeostasis and immunity than the individual heterogeneity.  
824



825 ACKNOWLEDGEMENTS

826 We would like to thank Dr Barbara Schraml, Ludwig-Maximilians-University of Munich, for providing  
827 access to data not yet available in the public domain. Mater Research Institute-University of Queensland  
828 is grateful for support from the Mater Foundation, Brisbane, Australia. The Translational Research  
829 Institute receives funding from the Australian Government.

830

831 **References**

832

- 833 1. van Furth, R., Cohn, Z. A., Hirsch, J. G., Humphrey, J. H., Spector, W. G., Langevoort, H. L.  
834 (1972) The mononuclear phagocyte system: a new classification of macrophages, monocytes,  
835 and their precursor cells. *Bull World Health Organ* 46, 845-52.
- 836 2. Amit, I., Winter, D. R., Jung, S. (2016) The role of the local environment and epigenetics in  
837 shaping macrophage identity and their effect on tissue homeostasis. *Nat Immunol* 17, 18-25.
- 838 3. Hoeffel, G. and Ginhoux, F. (2018) Fetal monocytes and the origins of tissue-resident  
839 macrophages. *Cell Immunol* 330, 5-15.
- 840 4. Hoeksema, M. A. and Glass, C. K. (2019) Nature and nurture of tissue-specific macrophage  
841 phenotypes. *Atherosclerosis* 281, 159-167.
- 842 5. Hume, D. A., Irvine, K. M., Pridans, C. (2018) The Mononuclear Phagocyte System: The  
843 Relationship between Monocytes and Macrophages. *Trends Immunol.* 40, 98-112
- 844 6. Chitu, V. and Stanley, E. R. (2017) Regulation of Embryonic and Postnatal Development by  
845 the CSF-1 Receptor. *Curr Top Dev Biol* 123, 229-275.
- 846 7. Hume, D. A., Caruso, M., Ferrari-Cestari, M., Summers, K. M., Pridans, C., Irvine, K. M.  
847 (2020) Phenotypic impacts of CSF1R deficiencies in humans and model organisms. *J Leukoc*  
848 *Biol* 107, 205-219.
- 849 8. Summers, K. M. and Hume, D. A. (2017) Identification of the macrophage-specific promoter  
850 signature in FANTOM5 mouse embryo developmental time course data. *J Leukoc Biol* 102,  
851 1081-1092.
- 852 9. Ginhoux, F. and Guilliams, M. (2016) Tissue-Resident Macrophage Ontogeny and  
853 Homeostasis. *Immunity* 44, 439-449.
- 854 10. Liu, Z., Gu, Y., Chakarov, S., Bleriot, C., Kwok, I., Chen, X., Shin, A., Huang, W., Dress, R.  
855 J., Dutertre, C. A., Schlitzer, A., Chen, J., Ng, L. G., Wang, H., Liu, Z., Su, B., Ginhoux, F.  
856 (2019) Fate Mapping via Ms4a3-Expression History Traces Monocyte-Derived Cells. *Cell* 178,  
857 1509-1525 e19.

- 858 11. Yona, S., Kim, K. W., Wolf, Y., Mildner, A., Varol, D., Breker, M., Strauss-Ayali, D., Viukov,  
859 S., Guilliams, M., Misharin, A., Hume, D. A., Perlman, H., Malissen, B., Zelzer, E., Jung, S.  
860 (2013) Fate mapping reveals origins and dynamics of monocytes and tissue macrophages under  
861 homeostasis. *Immunity* 38, 79-91.
- 862 12. Jenkins, S. J. and Hume, D. A. (2014) Homeostasis in the mononuclear phagocyte system.  
863 *Trends Immunol* 35, 358-67.
- 864 13. Bonnardel, J. and Guilliams, M. (2018) Developmental control of macrophage function. *Curr*  
865 *Opin Immunol* 50, 64-74.
- 866 14. Gomez Perdiguero, E., Klapproth, K., Schulz, C., Busch, K., Azzoni, E., Crozet, L., Garner,  
867 H., Trouillet, C., de Bruijn, M. F., Geissmann, F., Rodewald, H. R. (2015) Tissue-resident  
868 macrophages originate from yolk-sac-derived erythro-myeloid progenitors. *Nature* 518, 547-  
869 51.
- 870 15. Mass, E., Ballesteros, I., Farlik, M., Halbritter, F., Gunther, P., Crozet, L., Jacome-Galarza, C.  
871 E., Handler, K., Klughammer, J., Kobayashi, Y., Gomez-Perdiguero, E., Schultze, J. L., Beyer,  
872 M., Bock, C., Geissmann, F. (2016) Specification of tissue-resident macrophages during  
873 organogenesis. *Science* 353. aaf4238
- 874 16. Rojo, R., Raper, A., Ozdemir, D. D., Lefevre, L., Grabert, K., Wollscheid-Lengeling, E.,  
875 Bradford, B., Caruso, M., Gazova, I., Sanchez, A., Lisowski, Z. M., Alves, J., Molina-  
876 Gonzalez, I., Davtyan, H., Lodge, R. J., Glover, J. D., Wallace, R., Munro, D. A. D., David, E.,  
877 Amit, I., Miron, V. E., Priller, J., Jenkins, S. J., Hardingham, G. E., Blurton-Jones, M., Mabbott,  
878 N. A., Summers, K. M., Hohenstein, P., Hume, D. A., Pridans, C. (2019) Deletion of a *Csf1r*  
879 enhancer selectively impacts *CSF1R* expression and development of tissue macrophage  
880 populations. *Nat Commun* 10, 3215.
- 881 17. Henson, P. M. and Hume, D. A. (2006) Apoptotic cell removal in development and tissue  
882 homeostasis. *Trends Immunol* 27, 244-50.
- 883 18. Hume, D. A. (2008) Macrophages as APC and the dendritic cell myth. *J Immunol* 181, 5829-  
884 35.

- 885 19. Jakubzick, C. V., Randolph, G. J., Henson, P. M. (2017) Monocyte differentiation and antigen-  
886 presenting functions. *Nat Rev Immunol* 17, 349-362.
- 887 20. Guilliams, M., Ginhoux, F., Jakubzick, C., Naik, S. H., Onai, N., Schraml, B. U., Segura, E.,  
888 Tussiwand, R., Yona, S. (2014) Dendritic cells, monocytes and macrophages: a unified  
889 nomenclature based on ontogeny. *Nat Rev Immunol* 14, 571-8.
- 890 21. Sichien, D., Lambrecht, B. N., Guilliams, M., Scott, C. L. (2017) Development of conventional  
891 dendritic cells: from common bone marrow progenitors to multiple subsets in peripheral tissues.  
892 *Mucosal Immunol* 10, 831-844.
- 893 22. Gordon, S. and Pluddemann, A. (2017) Tissue macrophages: heterogeneity and functions.  
894 *BMC Biol* 15, 53.
- 895 23. Hume, D. A. (2008) Differentiation and heterogeneity in the mononuclear phagocyte system.  
896 *Mucosal Immunol* 1, 432-41.
- 897 24. Hume, D. A. (2011) Applications of myeloid-specific promoters in transgenic mice support in  
898 vivo imaging and functional genomics but do not support the concept of distinct macrophage  
899 and dendritic cell lineages or roles in immunity. *J Leukoc Biol* 89, 525-38.
- 900 25. Chakarov, S., Lim, H. Y., Tan, L., Lim, S. Y., See, P., Lum, J., Zhang, X. M., Foo, S.,  
901 Nakamizo, S., Duan, K., Kong, W. T., Gentek, R., Balachander, A., Carbajo, D., Bleriot, C.,  
902 Malleret, B., Tam, J. K. C., Baig, S., Shabeer, M., Toh, S. E. S., Schlitzer, A., Larbi, A.,  
903 Marichal, T., Malissen, B., Chen, J., Poidinger, M., Kabashima, K., Bajenoff, M., Ng, L. G.,  
904 Angeli, V., Ginhoux, F. (2019) Two distinct interstitial macrophage populations coexist across  
905 tissues in specific subtissular niches. *Science* 363.eaau0964
- 906 26. Gautier, E. L., Shay, T., Miller, J., Greter, M., Jakubzick, C., Ivanov, S., Helft, J., Chow, A.,  
907 Elpek, K. G., Gordonov, S., Mazloom, A. R., Ma'ayan, A., Chua, W. J., Hansen, T. H., Turley,  
908 S. J., Merad, M., Randolph, G. J., Immunological Genome, C. (2012) Gene-expression profiles  
909 and transcriptional regulatory pathways that underlie the identity and diversity of mouse tissue  
910 macrophages. *Nat Immunol* 13, 1118-28.
- 911 27. Miller, J. C., Brown, B. D., Shay, T., Gautier, E. L., Jovic, V., Cohain, A., Pandey, G., Leboeuf,  
912 M., Elpek, K. G., Helft, J., Hashimoto, D., Chow, A., Price, J., Greter, M., Bogunovic, M.,

- 913 Bellemare-Pelletier, A., Frenette, P. S., Randolph, G. J., Turley, S. J., Merad, M.,  
914 Immunological Genome, C. (2012) Deciphering the transcriptional network of the dendritic  
915 cell lineage. *Nat Immunol* 13, 888-99.
- 916 28. Hume, D. A. (2015) The Many Alternative Faces of Macrophage Activation. *Front Immunol*  
917 6, 370.
- 918 29. Kaur, S., Raggatt, L. J., Batoon, L., Hume, D. A., Levesque, J. P., Pettit, A. R. (2017) Role of  
919 bone marrow macrophages in controlling homeostasis and repair in bone and bone marrow  
920 niches. *Semin Cell Dev Biol* 61, 12-21.
- 921 30. MacDonald, K. P., Palmer, J. S., Cronau, S., Seppanen, E., Olver, S., Raffelt, N. C., Kuns, R.,  
922 Pettit, A. R., Clouston, A., Wainwright, B., Branstetter, D., Smith, J., Paxton, R. J., Cerretti, D.  
923 P., Bonham, L., Hill, G. R., Hume, D. A. (2010) An antibody against the colony-stimulating  
924 factor 1 receptor depletes the resident subset of monocytes and tissue- and tumor-associated  
925 macrophages but does not inhibit inflammation. *Blood* 116, 3955-63.
- 926 31. Geissmann, F., Manz, M. G., Jung, S., Sieweke, M. H., Merad, M., Ley, K. (2010) Development  
927 of monocytes, macrophages, and dendritic cells. *Science* 327, 656-61.
- 928 32. Sakai, M., Troutman, T. D., Seidman, J. S., Ouyang, Z., Spann, N. J., Abe, Y., Ego, K. M.,  
929 Bruni, C. M., Deng, Z., Schlachetzki, J. C. M., Nott, A., Bennett, H., Chang, J., Vu, B. T.,  
930 Pasillas, M. P., Link, V. M., Texari, L., Heinz, S., Thompson, B. M., McDonald, J. G.,  
931 Geissmann, F., Glass, C. K. (2019) Liver-Derived Signals Sequentially Reprogram Myeloid  
932 Enhancers to Initiate and Maintain Kupffer Cell Identity. *Immunity* 51, 655-670 e8.
- 933 33. De Schepper, S., Verheijden, S., Aguilera-Lizarraga, J., Viola, M. F., Boesmans, W.,  
934 Stakenborg, N., Voytyuk, I., Schmidt, I., Boeckx, B., Dierckx de Casterle, I., Baekelandt, V.,  
935 Gonzalez Dominguez, E., Mack, M., Depoortere, I., De Strooper, B., Sprangers, B.,  
936 Himmelreich, U., Soenen, S., Guilliams, M., Vanden Berghe, P., Jones, E., Lambrechts, D.,  
937 Boeckxstaens, G. (2019) Self-Maintaining Gut Macrophages Are Essential for Intestinal  
938 Homeostasis. *Cell* 175, 400-415
- 939 34. Shaw, T. N., Houston, S. A., Wemyss, K., Bridgeman, H. M., Barbera, T. A., Zangerle-Murray,  
940 T., Strangward, P., Ridley, A. J. L., Wang, P., Tamoutounour, S., Allen, J. E., Konkel, J. E.,

- 941 Grainger, J. R. (2018) Tissue-resident macrophages in the intestine are long lived and defined  
942 by Tim-4 and CD4 expression. *J Exp Med* 215, 1507-1518.
- 943 35. Bassler, K., Schulte-Schrepping, J., Warnat-Herresthal, S., Aschenbrenner, A. C., Schultze, J.  
944 L. (2019) The Myeloid Cell Compartment-Cell by Cell. *Annu Rev Immunol* 37, 269-293.
- 945 36. Hume, D. A. and Freeman, T. C. (2014) Transcriptomic analysis of mononuclear phagocyte  
946 differentiation and activation. *Immunol Rev* 262, 74-84.
- 947 37. Hume, D. A., Summers, K. M., Raza, S., Baillie, J. K., Freeman, T. C. (2010) Functional  
948 clustering and lineage markers: insights into cellular differentiation and gene function from  
949 large-scale microarray studies of purified primary cell populations. *Genomics* 95, 328-38.
- 950 38. Joshi, A., Pooley, C., Freeman, T. C., Lennartsson, A., Babina, M., Schmidl, C., Geijtenbeek,  
951 T., Consortium, F., Michoel, T., Severin, J., Itoh, M., Lassmann, T., Kawaji, H., Hayashizaki,  
952 Y., Carninci, P., Forrest, A. R., Rehli, M., Hume, D. A. (2015) Technical Advance:  
953 Transcription factor, promoter, and enhancer utilization in human myeloid cells. *J Leukoc Biol*  
954 97, 985-995.
- 955 39. Mabbott, N. A., Baillie, J. K., Brown, H., Freeman, T. C., Hume, D. A. (2013) An expression  
956 atlas of human primary cells: inference of gene function from coexpression networks. *BMC*  
957 *Genomics* 14, 632.
- 958 40. Mabbott, N. A., Kenneth Baillie, J., Hume, D. A., Freeman, T. C. (2010) Meta-analysis of  
959 lineage-specific gene expression signatures in mouse leukocyte populations. *Immunobiology*  
960 215, 724-36.
- 961 41. Doig, T. N., Hume, D. A., Theocharidis, T., Goodlad, J. R., Gregory, C. D., Freeman, T. C.  
962 (2013) Coexpression analysis of large cancer datasets provides insight into the cellular  
963 phenotypes of the tumour microenvironment. *BMC Genomics* 14, 469.
- 964 42. Hume, D. A., Mabbott, N., Raza, S., Freeman, T. C. (2013) Can DCs be distinguished from  
965 macrophages by molecular signatures? *Nat Immunol* 14, 187-9.
- 966 43. Bush, S. J., Freem, L., MacCallum, A. J., O'Dell, J., Wu, C., Afrasiabi, C., Psifidi, A., Stevens,  
967 M. P., Smith, J., Summers, K. M., Hume, D. A. (2018) Combination of novel and public RNA-

- 968 seq datasets to generate an mRNA expression atlas for the domestic chicken. *BMC Genomics*  
969 19, 594.
- 970 44. Summers, K., Bush, S., Wu, C., Su, A., Muriuki, C., Clark, E., Finlayson, H., Eory, L., Waddell,  
971 L., Talbot, R., Archibald, A., Hume, D. (2020) Functional annotation of the transcriptome of  
972 the pig, *sus scrofa*, based upon network analysis of an RNAseq transcriptional atlas. *Frontiers*  
973 *Genetics*. 10, 1355
- 974 45. Gal-Oz, S. T., Maier, B., Yoshida, H., Seddu, K., Elbaz, N., Czysz, C., Zuk, O., Stranger, B.  
975 E., Ner-Gaon, H., Shay, T. (2019) ImmGen report: sexual dimorphism in the immune system  
976 transcriptome. *Nat Commun* 10, 4295.
- 977 46. Bray, N. L., Pimentel, H., Melsted, P., Pachter, L. (2016) Near-optimal probabilistic RNA-seq  
978 quantification. *Nat Biotechnol* 34, 525-7.
- 979 47. Stephens, A. S., Stephens, S. R., Morrison, N. A. (2011) Internal control genes for quantitative  
980 RT-PCR expression analysis in mouse osteoblasts, osteoclasts and macrophages. *BMC Res*  
981 *Notes* 4, 410.
- 982 48. Hawley, C. A., Rojo, R., Raper, A., Sauter, K. A., Lisowski, Z. M., Grabert, K., Bain, C. C.,  
983 Davis, G. M., Louwe, P. A., Ostrowski, M. C., Hume, D. A., Pridans, C., Jenkins, S. J. (2018)  
984 *Csflr-mApple* Transgene Expression and Ligand Binding In Vivo Reveal Dynamics of CSF1R  
985 Expression within the Mononuclear Phagocyte System. *J Immunol* 200, 2209-2223.
- 986 49. Sasmono, R. T., Oceandy, D., Pollard, J. W., Tong, W., Pavli, P., Wainwright, B. J., Ostrowski,  
987 M. C., Himes, S. R., Hume, D. A. (2003) A macrophage colony-stimulating factor receptor-  
988 green fluorescent protein transgene is expressed throughout the mononuclear phagocyte system  
989 of the mouse. *Blood* 101, 1155-63.
- 990 50. Schyns, J., Bai, Q., Ruscitti, C., Radermecker, C., De Schepper, S., Chakarov, S., Farnir, F.,  
991 Pirottin, D., Ginhoux, F., Boeckxstaens, G., Bureau, F., Marichal, T. (2019) Non-classical  
992 tissue monocytes and two functionally distinct populations of interstitial macrophages populate  
993 the mouse lung. *Nat Commun* 10, 3964.
- 994 51. Hume, D. A., Summers, K. M., Rehli, M. (2016) Transcriptional Regulation and Macrophage  
995 Differentiation. *Microbiol Spectr* 4.

- 996 52. Rojo, R., Pridans, C., Langlais, D., Hume, D. A. (2017) Transcriptional mechanisms that  
997 control expression of the macrophage colony-stimulating factor receptor locus. *Clin Sci (Lond)*  
998 131, 2161-2182.
- 999 53. Jubb, A. W., Young, R. S., Hume, D. A., Bickmore, W. A. (2016) Enhancer Turnover Is  
1000 Associated with a Divergent Transcriptional Response to Glucocorticoid in Mouse and Human  
1001 Macrophages. *J Immunol* 196, 813-822.
- 1002 54. Audesse, A. J., Dhakal, S., Hassell, L. A., Gardell, Z., Nemtsova, Y., Webb, A. E. (2019)  
1003 FOXO3 directly regulates an autophagy network to functionally regulate proteostasis in adult  
1004 neural stem cells. *PLoS Genet* 15, e1008097.
- 1005 55. Chen, Y., Wu, J., Liang, G., Geng, G., Zhao, F., Yin, P., Nowsheen, S., Wu, C., Li, Y., Li, L.,  
1006 Kim, W., Zhou, Q., Huang, J., Liu, J., Zhang, C., Guo, G., Deng, M., Tu, X., Gao, X., Liu, Z.,  
1007 Chen, Y., Lou, Z., Luo, K., Yuan, J. (2020) CHK2-FOXK axis promotes transcriptional control  
1008 of autophagy programs. *Sci Adv* 6, eaax5819.
- 1009 56. Schaffner, I., Minakaki, G., Khan, M. A., Balta, E. A., Schlotzer-Schrehardt, U., Schwarz, T.  
1010 J., Beckervordersandforth, R., Winner, B., Webb, A. E., DePinho, R. A., Paik, J., Wurst, W.,  
1011 Klucken, J., Lie, D. C. (2018) FoxO Function Is Essential for Maintenance of Autophagic Flux  
1012 and Neuronal Morphogenesis in Adult Neurogenesis. *Neuron* 99, 1188-1203 e6.
- 1013 57. Choi, S., You, S., Kim, D., Choi, S. Y., Kwon, H. M., Kim, H. S., Hwang, D., Park, Y. J., Cho,  
1014 C. S., Kim, W. U. (2017) Transcription factor NFAT5 promotes macrophage survival in  
1015 rheumatoid arthritis. *J Clin Invest* 127, 954-969.
- 1016 58. Roberts, T. L., Idris, A., Dunn, J. A., Kelly, G. M., Burnton, C. M., Hodgson, S., Hardy, L. L.,  
1017 Garceau, V., Sweet, M. J., Ross, I. L., Hume, D. A., Stacey, K. J. (2009) HIN-200 proteins  
1018 regulate caspase activation in response to foreign cytoplasmic DNA. *Science* 323, 1057-60.
- 1019 59. Briard, B., Place, D. E., Kanneganti, T. D. (2020) DNA Sensing in the Innate Immune  
1020 Response. *Physiology (Bethesda)* 35, 112-124.
- 1021 60. Zhao, Y., Shi, J., Shi, X., Wang, Y., Wang, F., Shao, F. (2016) Genetic functions of the NAIIP  
1022 family of inflammasome receptors for bacterial ligands in mice. *J Exp Med* 213, 647-56.



- 1023 61. Pridans, C., Raper, A., Davis, G. M., Alves, J., Sauter, K. A., Lefevre, L., Regan, T., Meek, S.,  
1024 Sutherland, L., Thomson, A. J., Clohisey, S., Bush, S. J., Rojo, R., Lisowski, Z. M., Wallace,  
1025 R., Grabert, K., Upton, K. R., Tsai, Y. T., Brown, D., Smith, L. B., Summers, K. M., Mabbott,  
1026 N. A., Piccardo, P., Cheeseman, M. T., Burdon, T., Hume, D. A. (2018) Pleiotropic Impacts of  
1027 Macrophage and Microglial Deficiency on Development in Rats with Targeted Mutation of the  
1028 *Csf1r* Locus. *J Immunol* 201, 2683-2699.
- 1029 62. Giotti, B., Chen, S. H., Barnett, M. W., Regan, T., Ly, T., Wiemann, S., Hume, D. A., Freeman,  
1030 T. C. (2019) Assembly of a parts list of the human mitotic cell cycle machinery. *J Mol Cell*  
1031 *Biol* 11, 703-718.
- 1032 63. Aoki, M., Aoki, H., Ramanathan, R., Hait, N. C., Takabe, K. (2016) Sphingosine-1-Phosphate  
1033 Signaling in Immune Cells and Inflammation: Roles and Therapeutic Potential. *Mediators*  
1034 *Inflamm* 2016, 8606878.
- 1035 64. Weichand, B., Popp, R., Dziumbala, S., Mora, J., Strack, E., Elwakeel, E., Frank, A. C.,  
1036 Scholich, K., Pierre, S., Syed, S. N., Olesch, C., Ringleb, J., Oren, B., Doring, C., Savai, R.,  
1037 Jung, M., von Knethen, A., Levkau, B., Fleming, I., Weigert, A., Brune, B. (2017) S1PR1 on  
1038 tumor-associated macrophages promotes lymphangiogenesis and metastasis via NLRP3/IL-  
1039 1beta. *J Exp Med* 214, 2695-2713.
- 1040 65. Dutta, B., Arya, R. K., Goswami, R., Alharbi, M. O., Sharma, S., Rahaman, S. O. (2020) Role  
1041 of macrophage TRPV4 in inflammation. *Lab Invest* 100, 178-185.
- 1042 66. Morty, R. E. and Kuebler, W. M. (2014) TRPV4: an exciting new target to promote  
1043 alveolocapillary barrier function. *Am J Physiol Lung Cell Mol Physiol* 307, L817-21.
- 1044 67. Issitt, T., Bosseboeuf, E., De Winter, N., Dufton, N., Gestri, G., Senatore, V., Chikh, A., Randi,  
1045 A. M., Raimondi, C. (2019) Neuropilin-1 Controls Endothelial Homeostasis by Regulating  
1046 Mitochondrial Function and Iron-Dependent Oxidative Stress. *iScience* 11, 205-223.
- 1047 68. Luo, B., Gan, W., Liu, Z., Shen, Z., Wang, J., Shi, R., Liu, Y., Liu, Y., Jiang, M., Zhang, Z.,  
1048 Wu, Y. (2016) Erythropoietin Signaling in Macrophages Promotes Dying Cell Clearance and  
1049 Immune Tolerance. *Immunity* 44, 287-302.

- 1050 69. Hardbower, D. M., Singh, K., Asim, M., Verriere, T. G., Olivares-Villagomez, D., Barry, D.  
1051 P., Allaman, M. M., Washington, M. K., Peek, R. M., Jr., Piazzuelo, M. B., Wilson, K. T. (2016)  
1052 EGFR regulates macrophage activation and function in bacterial infection. *J Clin Invest* 126,  
1053 3296-312.
- 1054 70. Ivanov, S. and Randolph, G. J. (2017) Myeloid cells pave the way for lymphatic system  
1055 development and maintenance. *Pflugers Arch* 469, 465-472.
- 1056 71. Sanin, D. E., Matsushita, M., Klein Geltink, R. I., Grzes, K. M., van Teijlingen Bakker, N.,  
1057 Corrado, M., Kabat, A. M., Buck, M. D., Qiu, J., Lawless, S. J., Cameron, A. M., Villa, M.,  
1058 Baixauli, F., Patterson, A. E., Hassler, F., Curtis, J. D., O'Neill, C. M., O'Sullivan, D., Wu, D.,  
1059 Mittler, G., Huang, S. C., Pearce, E. L., Pearce, E. J. (2018) Mitochondrial Membrane Potential  
1060 Regulates Nuclear Gene Expression in Macrophages Exposed to Prostaglandin E2. *Immunity*  
1061 49, 1021-1033 e6.
- 1062 72. Yu, J., Zanotti, S., Schilling, L., Canalis, E. (2018) Nuclear factor of activated T cells 2 is  
1063 required for osteoclast differentiation and function in vitro but not in vivo. *J Cell Biochem* 119,  
1064 9334-9345.
- 1065 73. Van den Bossche, J., Malissen, B., Mantovani, A., De Baetselier, P., Van Ginderachter, J. A.  
1066 (2012) Regulation and function of the E-cadherin/catenin complex in cells of the monocyte-  
1067 macrophage lineage and DCs. *Blood* 119, 1623-33.
- 1068 74. Murray, P. J., Allen, J. E., Biswas, S. K., Fisher, E. A., Gilroy, D. W., Goerdts, S., Gordon, S.,  
1069 Hamilton, J. A., Ivashkiv, L. B., Lawrence, T., Locati, M., Mantovani, A., Martinez, F. O.,  
1070 Mege, J. L., Mosser, D. M., Natoli, G., Saeij, J. P., Schultze, J. L., Shirey, K. A., Sica, A.,  
1071 Suttles, J., Udalova, I., van Ginderachter, J. A., Vogel, S. N., Wynn, T. A. (2014) Macrophage  
1072 activation and polarization: nomenclature and experimental guidelines. *Immunity* 41, 14-20.
- 1073 75. Spadaro, O., Camell, C. D., Bosurgi, L., Nguyen, K. Y., Youm, Y. H., Rothlin, C. V., Dixit, V.  
1074 D. (2017) IGF1 Shapes Macrophage Activation in Response to Immunometabolic Challenge.  
1075 *Cell Rep* 19, 225-234.

- 1076 76. Maridas, D. E., DeMambro, V. E., Le, P. T., Mohan, S., Rosen, C. J. (2017) IGFBP4 Is  
1077 Required for Adipogenesis and Influences the Distribution of Adipose Depots. *Endocrinology*  
1078 158, 3488-3500.
- 1079 77. Maridas, D. E., DeMambro, V. E., Le, P. T., Nagano, K., Baron, R., Mohan, S., Rosen, C. J.  
1080 (2017) IGFBP-4 regulates adult skeletal growth in a sex-specific manner. *J Endocrinol* 233,  
1081 131-144.
- 1082 78. Hume, D. A. (2006) The mononuclear phagocyte system. *Curr Opin Immunol* 18, 49-53.
- 1083 79. Schulz, C., Gomez Perdiguero, E., Chorro, L., Szabo-Rogers, H., Cagnard, N., Kierdorf, K.,  
1084 Prinz, M., Wu, B., Jacobsen, S. E., Pollard, J. W., Frampton, J., Liu, K. J., Geissmann, F. (2012)  
1085 A lineage of myeloid cells independent of Myb and hematopoietic stem cells. *Science* 336, 86-  
1086 90.
- 1087 80. Bain, C. C. and Schridde, A. (2018) Origin, Differentiation, and Function of Intestinal  
1088 Macrophages. *Front Immunol* 9, 2733.
- 1089 81. Briseno, C. G., Haldar, M., Kretzer, N. M., Wu, X., Theisen, D. J., Kc, W., Durai, V., Grajales-  
1090 Reyes, G. E., Iwata, A., Bagadia, P., Murphy, T. L., Murphy, K. M. (2016) Distinct  
1091 Transcriptional Programs Control Cross-Priming in Classical and Monocyte-Derived Dendritic  
1092 Cells. *Cell Rep* 15, 2462-74.
- 1093 82. Waddell, L. A., Lefevre, L., Bush, S. J., Raper, A., Young, R., Lisowski, Z. M., McCulloch,  
1094 M. E. B., Muriuki, C., Sauter, K. A., Clark, E. L., Irvine, K. M., Pridans, C., Hope, J. C., Hume,  
1095 D. A. (2018) ADGRE1 (EMR1, F4/80) Is a Rapidly-Evolving Gene Expressed in Mammalian  
1096 Monocyte-Macrophages. *Front Immunol* 9, 2246.
- 1097 83. Scott, C. L. and Guilliams, M. (2018) The role of Kupffer cells in hepatic iron and lipid  
1098 metabolism. *J Hepatol* 69, 1197-1199.
- 1099 84. Ma, F., Liu, S. Y., Razani, B., Arora, N., Li, B., Kagechika, H., Tontonoz, P., Nunez, V., Ricote,  
1100 M., Cheng, G. (2014) Retinoid X receptor alpha attenuates host antiviral response by  
1101 suppressing type I interferon. *Nat Commun* 5, 5494.
- 1102 85. van der Spek, A. H., Fliers, E., Boelen, A. (2017) Thyroid hormone metabolism in innate  
1103 immune cells. *J Endocrinol* 232, R67-R81.

- 1104 86. Roussel-Gervais, A., Naciri, I., Kirsh, O., Kasprzyk, L., Velasco, G., Grillo, G., Dubus, P.,  
1105 Defosse, P. A. (2017) Loss of the Methyl-CpG-Binding Protein ZBTB4 Alters Mitotic  
1106 Checkpoint, Increases Aneuploidy, and Promotes Tumorigenesis. *Cancer Res* 77, 62-73.
- 1107 87. Haldar, M., Kohyama, M., So, A. Y., Kc, W., Wu, X., Briseno, C. G., Satpathy, A. T., Kretzer,  
1108 N. M., Arase, H., Rajasekaran, N. S., Wang, L., Egawa, T., Igarashi, K., Baltimore, D., Murphy,  
1109 T. L., Murphy, K. M. (2014) Heme-mediated SPI-C induction promotes monocyte  
1110 differentiation into iron-recycling macrophages. *Cell* 156, 1223-1234.
- 1111 88. Kohyama, M., Ise, W., Edelson, B. T., Wilker, P. R., Hildner, K., Mejia, C., Frazier, W. A.,  
1112 Murphy, T. L., Murphy, K. M. (2009) Role for Spi-C in the development of red pulp  
1113 macrophages and splenic iron homeostasis. *Nature* 457, 318-21.
- 1114 89. Bain, C. C., Hawley, C. A., Garner, H., Scott, C. L., Schridde, A., Steers, N. J., Mack, M., Joshi,  
1115 A., Williams, M., Mowat, A. M., Geissmann, F., Jenkins, S. J. (2016) Long-lived self-  
1116 renewing bone marrow-derived macrophages displace embryo-derived cells to inhabit adult  
1117 serous cavities. *Nat Commun* 7, ncomms11852.
- 1118 90. Okabe, Y. and Medzhitov, R. (2014) Tissue-specific signals control reversible program of  
1119 localization and functional polarization of macrophages. *Cell* 157, 832-44.
- 1120 91. Costelloe, E. O., Stacey, K. J., Antalis, T. M., Hume, D. A. (1999) Regulation of the  
1121 plasminogen activator inhibitor-2 (PAI-2) gene in murine macrophages. Demonstration of a  
1122 novel pattern of responsiveness to bacterial endotoxin. *J Leukoc Biol* 66, 172-82.
- 1123 92. Schroder, W. A., Hirata, T. D., Le, T. T., Gardner, J., Boyle, G. M., Ellis, J., Nakayama, E.,  
1124 Pathirana, D., Nakaya, H. I., Suhrbier, A. (2019) SerpinB2 inhibits migration and promotes a  
1125 resolution phase signature in large peritoneal macrophages. *Sci Rep* 9, 12421.
- 1126 93. Capucha, T., Mizraji, G., Segev, H., Blecher-Gonen, R., Winter, D., Khalaileh, A., Tabib, Y.,  
1127 Attal, T., Nassar, M., Zelentsova, K., Kisos, H., Zenke, M., Sere, K., Hieronymus, T., Burstyn-  
1128 Cohen, T., Amit, I., Wilensky, A., Hovav, A. H. (2015) Distinct Murine Mucosal Langerhans  
1129 Cell Subsets Develop from Pre-dendritic Cells and Monocytes. *Immunity* 43, 369-81.
- 1130 94. Doebel, T., Voisin, B., Nagao, K. (2017) Langerhans Cells - The Macrophage in Dendritic Cell  
1131 Clothing. *Trends Immunol* 38, 817-828.

- 1132 95. Gross-Vered, M., Trzebanski, S., Shemer, A., Bernshtein, B., Curato, C., Stelzer, G., Salame,  
1133 T. M., David, E., Boura-Halfon, S., Chappell-Maor, L., Leshkowitz, D., Jung, S. (2020)  
1134 Defining murine monocyte differentiation into colonic and ileal macrophages. *Elife* 9, e49998
- 1135 96. Hung, L. Y., Johnson, J. L., Ji, Y., Christian, D. A., Herbine, K. R., Pastore, C. F., Herbert, D.  
1136 R. (2019) Cell-Intrinsic Wnt4 Influences Conventional Dendritic Cell Fate Determination to  
1137 Suppress Type 2 Immunity. *J Immunol* 203, 511-519.
- 1138 97. Sehgal, A., Donaldson, D. S., Pridans, C., Sauter, K. A., Hume, D. A., Mabbott, N. A. (2018)  
1139 The role of CSF1R-dependent macrophages in control of the intestinal stem-cell niche. *Nat*  
1140 *Commun* 9, 1272.
- 1141 98. Shang, Y., Coppo, M., He, T., Ning, F., Yu, L., Kang, L., Zhang, B., Ju, C., Qiao, Y., Zhao, B.,  
1142 Gessler, M., Rogatsky, I., Hu, X. (2016) The transcriptional repressor Hes1 attenuates  
1143 inflammation by regulating transcription elongation. *Nat Immunol* 17, 930-7.
- 1144 99. Zhang, X., Li, X., Ning, F., Shang, Y., Hu, X. (2019) TLE4 acts as a corepressor of Hes1 to  
1145 inhibit inflammatory responses in macrophages. *Protein Cell* 10, 300-305.
- 1146 100. Schridde, A., Bain, C. C., Mayer, J. U., Montgomery, J., Pollet, E., Denecke, B., Milling, S. W.  
1147 F., Jenkins, S. J., Dalod, M., Henri, S., Malissen, B., Pabst, O., McL Mowat, A. (2017) Tissue-  
1148 specific differentiation of colonic macrophages requires TGFbeta receptor-mediated signaling.  
1149 *Mucosal Immunol* 10, 1387-1399.
- 1150 101. Morris, D. L., Singer, K., Lumeng, C. N. (2011) Adipose tissue macrophages: phenotypic  
1151 plasticity and diversity in lean and obese states. *Curr Opin Clin Nutr Metab Care* 14, 341-6.
- 1152 102. Lee, M. R., Lim, C. J., Lee, Y. H., Park, J. G., Sonn, S. K., Lee, M. N., Jung, I. H., Jeong, S. J.,  
1153 Jeon, S., Lee, M., Oh, K. S., Yang, Y., Kim, J. B., Choi, H. S., Jeong, W., Jeong, T. S., Yoon,  
1154 W. K., Kim, H. C., Choi, J. H., Oh, G. T. (2014) The adipokine Retnla modulates cholesterol  
1155 homeostasis in hyperlipidemic mice. *Nat Commun* 5, 4410.
- 1156 103. Kumamoto, Y., Camporez, J. P. G., Jurczak, M. J., Shanabrough, M., Horvath, T., Shulman,  
1157 G. I., Iwasaki, A. (2016) CD301b(+) Mononuclear Phagocytes Maintain Positive Energy  
1158 Balance through Secretion of Resistin-like Molecule Alpha. *Immunity* 45, 583-596.

- 1159 104. Fujita, K., Chakarov, S., Kobayashi, T., Sakamoto, K., Voisin, B., Duan, K., Nakagawa, T.,  
1160 Horiuchi, K., Amagai, M., Ginhoux, F., Nagao, K. (2019) Cell-autonomous FLT3L shedding  
1161 via ADAM10 mediates conventional dendritic cell development in mouse spleen. *Proc Natl*  
1162 *Acad Sci U S A* 116, 14714-14723.
- 1163 105. Pool, L., Rivollier, A., Agace, W. W. (2020) Deletion of IRF4 in Dendritic Cells Leads to  
1164 Delayed Onset of T Cell-Dependent Colitis. *J Immunol* 204, 1047-1055.
- 1165 106. Anderson, D. A., 3rd, Murphy, K. M., Briseno, C. G. (2018) Development, Diversity, and  
1166 Function of Dendritic Cells in Mouse and Human. *Cold Spring Harb Perspect Biol* 10.a028613
- 1167 107. Forster, R., Davalos-Misslitz, A. C., Rot, A. (2008) CCR7 and its ligands: balancing immunity  
1168 and tolerance. *Nat Rev Immunol* 8, 362-71.
- 1169 108. Hildner, K., Edelson, B. T., Purtha, W. E., Diamond, M., Matsushita, H., Kohyama, M.,  
1170 Calderon, B., Schraml, B. U., Unanue, E. R., Diamond, M. S., Schreiber, R. D., Murphy, T. L.,  
1171 Murphy, K. M. (2008) *Batf3* deficiency reveals a critical role for CD8alpha+ dendritic cells in  
1172 cytotoxic T cell immunity. *Science* 322, 1097-1100.
- 1173 109. Bagadia, P., Huang, X., Liu, T. T., Durai, V., Grajales-Reyes, G. E., Nitschke, M., Modrusan,  
1174 Z., Granja, J. M., Satpathy, A. T., Briseno, C. G., Gargaro, M., Iwata, A., Kim, S., Chang, H.  
1175 Y., Shaw, A. S., Murphy, T. L., Murphy, K. M. (2019) An *Nfil3-Zeb2-Id2* pathway imposes  
1176 *Irf8* enhancer switching during cDC1 development. *Nat Immunol* 20, 1174-1185.
- 1177 110. Satpathy, A. T., Kc, W., Albring, J. C., Edelson, B. T., Kretzer, N. M., Bhattacharya, D.,  
1178 Murphy, T. L., Murphy, K. M. (2012) *Zbtb46* expression distinguishes classical dendritic cells  
1179 and their committed progenitors from other immune lineages. *J Exp Med* 209, 1135-52.
- 1180 111. Salei, N., Rambichler, S., Salvermoser, J., Papaioannou, N. E., Schuchert, R., Pakalniskyte, D.,  
1181 Li, N., Marschner, J. A., Lichtnekert, J., Stremmel, C., Cernilogar, F. M., Salvermoser, M.,  
1182 Walzog, B., Straub, T., Schotta, G., Anders, H. J., Schulz, C., Schraml, B. U. (2020) The  
1183 Kidney Contains Ontogenetically Distinct Dendritic Cell and Macrophage Subtypes throughout  
1184 Development That Differ in Their Inflammatory Properties. *J Am Soc Nephrol* 31, 257-278.

- 1185 112. Nagae, M., Ikeda, A., Hanashima, S., Kojima, T., Matsumoto, N., Yamamoto, K., Yamaguchi,  
1186 Y. (2016) Crystal structure of human dendritic cell inhibitory receptor C-type lectin domain  
1187 reveals the binding mode with N-glycan. *FEBS Lett* 590, 1280-8.
- 1188 113. Troegeler, A., Mercier, I., Cougoule, C., Pietretti, D., Colom, A., Duval, C., Vu Manh, T. P.,  
1189 Capilla, F., Poincloux, R., Pingris, K., Nigou, J., Rademann, J., Dalod, M., Verreck, F. A., Al  
1190 Saati, T., Lugo-Villarino, G., Lepenies, B., Hudrisier, D., Neyrolles, O. (2017) C-type lectin  
1191 receptor DCIR modulates immunity to tuberculosis by sustaining type I interferon signaling in  
1192 dendritic cells. *Proc Natl Acad Sci U S A* 114, E540-E549.
- 1193 114. Uto, T., Fukaya, T., Takagi, H., Arimura, K., Nakamura, T., Kojima, N., Malissen, B., Sato, K.  
1194 (2016) Clec4A4 is a regulatory receptor for dendritic cells that impairs inflammation and T-  
1195 cell immunity. *Nat Commun* 7, 11273.
- 1196 115. Wells, C. A., Salvage-Jones, J. A., Li, X., Hitchens, K., Butcher, S., Murray, R. Z., Beckhouse,  
1197 A. G., Lo, Y. L., Manzanero, S., Cobbold, C., Schroder, K., Ma, B., Orr, S., Stewart, L., Lebus,  
1198 D., Sobieszczuk, P., Hume, D. A., Stow, J., Blanchard, H., Ashman, R. B. (2008) The  
1199 macrophage-inducible C-type lectin, mincle, is an essential component of the innate immune  
1200 response to *Candida albicans*. *J Immunol* 180, 7404-13.
- 1201 116. Link, V. M., Duttke, S. H., Chun, H. B., Holtman, I. R., Westin, E., Hoeksema, M. A., Abe, Y.,  
1202 Skola, D., Romanoski, C. E., Tao, J., Fonseca, G. J., Troutman, T. D., Spann, N. J., Strid, T.,  
1203 Sakai, M., Yu, M., Hu, R., Fang, R., Metzler, D., Ren, B., Glass, C. K. (2018) Analysis of  
1204 Genetically Diverse Macrophages Reveals Local and Domain-wide Mechanisms that Control  
1205 Transcription Factor Binding and Function. *Cell* 173, 1796-1809 e17.
- 1206 117. Tamura, A., Hirai, H., Yokota, A., Kamio, N., Sato, A., Shoji, T., Kashiwagi, T., Torikoshi, Y.,  
1207 Miura, Y., Tenen, D. G., Maekawa, T. (2017) C/EBPbeta is required for survival of Ly6C(-)  
1208 monocytes. *Blood* 130, 1809-1818.
- 1209 118. Mildner, A., Schonheit, J., Giladi, A., David, E., Lara-Astiaso, D., Lorenzo-Vivas, E., Paul, F.,  
1210 Chappell-Maor, L., Priller, J., Leutz, A., Amit, I., Jung, S. (2017) Genomic Characterization of  
1211 Murine Monocytes Reveals C/EBPbeta Transcription Factor Dependence of Ly6C(-) Cells.  
1212 *Immunity* 46, 849-862 e7.

- 1213 119. Bornstein, C., Winter, D., Barnett-Itzhaki, Z., David, E., Kadri, S., Garber, M., Amit, I. (2014)  
1214 A negative feedback loop of transcription factors specifies alternative dendritic cell chromatin  
1215 States. *Mol Cell* 56, 749-62.
- 1216 120. Satpathy, A. T., Wu, X., Albring, J. C., Murphy, K. M. (2012) Re(de)fining the dendritic cell  
1217 lineage. *Nat Immunol* 13, 1145-54.
- 1218 121. Wu, X., Briseno, C. G., Durai, V., Albring, J. C., Haldar, M., Bagadia, P., Kim, K. W.,  
1219 Randolph, G. J., Murphy, T. L., Murphy, K. M. (2016) Maf $\beta$  lineage tracing to distinguish  
1220 macrophages from other immune lineages reveals dual identity of Langerhans cells. *J Exp Med*  
1221 213, 2553-2565.
- 1222 122. Papadakis, K. A., Krempsi, J., Svingen, P., Xiong, Y., Sarmiento, O. F., Lomber, G. A.,  
1223 Urrutia, R. A., Faubion, W. A. (2015) Kruppel-like factor KLF10 deficiency predisposes to  
1224 colitis through colonic macrophage dysregulation. *Am J Physiol Gastrointest Liver Physiol*  
1225 309, G900-9.
- 1226 123. van den Brink, S. C., Sage, F., Vertesy, A., Spanjaard, B., Peterson-Maduro, J., Baron, C. S.,  
1227 Robin, C., van Oudenaarden, A. (2017) Single-cell sequencing reveals dissociation-induced  
1228 gene expression in tissue subpopulations. *Nat Methods* 14, 935-936.
- 1229 124. Van Hove, H., Martens, L., Scheyltjens, I., De Vlaminck, K., Pombo Antunes, A. R., De Prijck,  
1230 S., Vandamme, N., De Schepper, S., Van Isterdael, G., Scott, C. L., Aerts, J., Berx, G.,  
1231 Boeckxstaens, G. E., Vandenbroucke, R. E., Vereecke, L., Moechars, D., Guilliams, M., Van  
1232 Ginderachter, J. A., Saeys, Y., Movahedi, K. (2019) A single-cell atlas of mouse brain  
1233 macrophages reveals unique transcriptional identities shaped by ontogeny and tissue  
1234 environment. *Nat Neurosci* 22, 1021-1035.
- 1235 125. Pirzgalska, R. M., Seixas, E., Seidman, J. S., Link, V. M., Sanchez, N. M., Mahu, I., Mendes,  
1236 R., Gres, V., Kubasova, N., Morris, I., Arus, B. A., Larabee, C. M., Vasques, M., Tortosa, F.,  
1237 Sousa, A. L., Anandan, S., Tranfield, E., Hahn, M. K., Iannaccone, M., Spann, N. J., Glass, C.  
1238 K., Domingos, A. I. (2017) Sympathetic neuron-associated macrophages contribute to obesity  
1239 by importing and metabolizing norepinephrine. *Nat Med* 23, 1309-1318.



- 1240 126. Ryan, D. G. and O'Neill, L. A. J. (2020) Krebs Cycle Reborn in Macrophage  
1241 Immunometabolism. *Annu Rev Immunol*. Epub doi: 10.1146/annurev-immunol-081619-  
1242 104850.
- 1243 127. Gray, E. E., Friend, S., Suzuki, K., Phan, T. G., Cyster, J. G. (2012) Subcapsular sinus  
1244 macrophage fragmentation and CD169<sup>+</sup> bleb acquisition by closely associated IL-17-  
1245 committed innate-like lymphocytes. *PLoS One* 7, e38258.
- 1246 128. Lynch, R. W., Hawley, C. A., Pellicoro, A., Bain, C. C., Iredale, J. P., Jenkins, S. J. (2018) An  
1247 efficient method to isolate Kupffer cells eliminating endothelial cell contamination and  
1248 selective bias. *J Leukoc Biol*. 104, 578-586
- 1249 129. Bonnardel, J., T'Jonck, W., Gaublomme, D., Browaeys, R., Scott, C. L., Martens, L., Vanneste,  
1250 B., De Prijck, S., Nedospasov, S. A., Kremer, A., Van Hamme, E., Borghgraef, P., Toussaint,  
1251 W., De Bleser, P., Mannaerts, I., Beschin, A., van Grunsven, L. A., Lambrecht, B. N., Taghon,  
1252 T., Lippens, S., Elewaut, D., Saey, Y., Guilliams, M. (2019) Stellate Cells, Hepatocytes, and  
1253 Endothelial Cells Imprint the Kupffer Cell Identity on Monocytes Colonizing the Liver  
1254 Macrophage Niche. *Immunity* 51, 638-654 e9.
- 1255 130. Ying, W., Lee, Y. S., Dong, Y., Seidman, J. S., Yang, M., Isaac, R., Seo, J. B., Yang, B. H.,  
1256 Wollam, J., Riopel, M., McNelis, J., Glass, C. K., Olefsky, J. M., Fu, W. (2019) Expansion of  
1257 Islet-Resident Macrophages Leads to Inflammation Affecting beta Cell Proliferation and  
1258 Function in Obesity. *Cell Metab* 29, 457-474 e5.
- 1259 131. Li, W., Wang, Y., Zhao, H., Zhang, H., Xu, Y., Wang, S., Guo, X., Huang, Y., Zhang, S., Han,  
1260 Y., Wu, X., Rice, C. M., Huang, G., Gallagher, P. G., Mendelson, A., Yazdanbakhsh, K., Liu,  
1261 J., Chen, L., An, X. (2019) Identification and transcriptome analysis of erythroblastic island  
1262 macrophages. *Blood* 134, 480-491.
- 1263 132. A-Gonzales, N., Quintana, J. A., Garcia-Silva, S., Mazariegos, M., Gonzalez de la Aleja, A.,  
1264 Nicolas-Avila, J. A., Walter, W., Adrover, J. M., Crainiciuc, G., Kuchroo, V. K., Rothlin, C.  
1265 V., Peinado, H., Castrillo, A., Ricote, M., Hidalgo, A. (2017) Phagocytosis imprints  
1266 heterogeneity in tissue-resident macrophages. *J Exp Med* 214, 1281-1296.

- 1267 133. Brown, C. C., Gudjonson, H., Pritykin, Y., Deep, D., Lavallee, V. P., Mendoza, A., Fromme,  
1268 R., Mazutis, L., Ariyan, C., Leslie, C., Pe'er, D., Rudensky, A. Y. (2019) Transcriptional Basis  
1269 of Mouse and Human Dendritic Cell Heterogeneity. *Cell* 179, 846-863 e24.
- 1270 134. Lambert, S. A., Jolma, A., Campitelli, L. F., Das, P. K., Yin, Y., Albu, M., Chen, X., Taipale,  
1271 J., Hughes, T. R., Weirauch, M. T. (2018) The Human Transcription Factors. *Cell* 175, 598-  
1272 599.
- 1273 135. Anderson, D. A., 3rd, Murphy, T. L., Eisenman, R. N., Murphy, K. M. (2020) The MYCL and  
1274 MXD1 transcription factors regulate the fitness of murine dendritic cells. *Proc Natl Acad Sci*  
1275 U S A.
- 1276 136. Curi, R., de Siqueira Mendes, R., de Campos Crispin, L. A., Norata, G. D., Sampaio, S. C.,  
1277 Newsholme, P. (2017) A past and present overview of macrophage metabolism and functional  
1278 outcomes. *Clin Sci (Lond)* 131, 1329-1342.
- 1279 137. Liu, P. S., Wang, H., Li, X., Chao, T., Teav, T., Christen, S., Di Conza, G., Cheng, W. C.,  
1280 Chou, C. H., Vavakova, M., Muret, C., Debackere, K., Mazzone, M., Huang, H. D., Fendt, S.  
1281 M., Ivanisevic, J., Ho, P. C. (2017) alpha-ketoglutarate orchestrates macrophage activation  
1282 through metabolic and epigenetic reprogramming. *Nat Immunol* 18, 985-994.
- 1283 138. Bhutia, Y. D. and Ganapathy, V. (2016) Glutamine transporters in mammalian cells and their  
1284 functions in physiology and cancer. *Biochim Biophys Acta* 1863, 2531-9.
- 1285 139. Freerman, A. J., Zhao, L., Pingili, A. K., Teng, B., Cozzo, A. J., Fuller, A. M., Johnson, A.  
1286 R., Milner, J. J., Lim, M. F., Galanko, J. A., Beck, M. A., Bear, J. E., Rotty, J. D., Bezavada,  
1287 L., Smallwood, H. S., Puchowicz, M. A., Liu, J., Locasale, J. W., Lee, D. P., Bennett, B. J.,  
1288 Abel, E. D., Rathmell, J. C., Makowski, L. (2019) Myeloid Slc2a1-Deficient Murine Model  
1289 Revealed Macrophage Activation and Metabolic Phenotype Are Fueled by GLUT1. *J Immunol*  
1290 202, 1265-1286.
- 1291 140. Fang, H. Y., Hughes, R., Murdoch, C., Coffelt, S. B., Biswas, S. K., Harris, A. L., Johnson, R.  
1292 S., Imityaz, H. Z., Simon, M. C., Fredlund, E., Greten, F. R., Rius, J., Lewis, C. E. (2009)  
1293 Hypoxia-inducible factors 1 and 2 are important transcriptional effectors in primary  
1294 macrophages experiencing hypoxia. *Blood* 114, 844-59.

- 1295 141. Johnson, A. R., Qin, Y., Cozzo, A. J., Freemerman, A. J., Huang, M. J., Zhao, L., Sampey, B.  
1296 P., Milner, J. J., Beck, M. A., Damania, B., Rashid, N., Galanko, J. A., Lee, D. P., Edin, M. L.,  
1297 Zeldin, D. C., Fueger, P. T., Dietz, B., Stahl, A., Wu, Y., Mohlke, K. L., Makowski, L. (2016)  
1298 Metabolic reprogramming through fatty acid transport protein 1 (FATP1) regulates  
1299 macrophage inflammatory potential and adipose inflammation. *Mol Metab* 5, 506-526.
- 1300 142. Zhao, L., Cozzo, A. J., Johnson, A. R., Christensen, T., Freemerman, A. J., Bear, J. E., Rotty,  
1301 J. D., Bennett, B. J., Makowski, L. (2017) Lack of myeloid Fatp1 increases atherosclerotic  
1302 lesion size in *Ldlr(-/-)* mice. *Atherosclerosis* 266, 182-189.
- 1303 143. Nomura, N., Verdon, G., Kang, H. J., Shimamura, T., Nomura, Y., Sonoda, Y., Hussien, S. A.,  
1304 Qureshi, A. A., Coincon, M., Sato, Y., Abe, H., Nakada-Nakura, Y., Hino, T., Arakawa, T.,  
1305 Kusano-Arai, O., Iwanari, H., Murata, T., Kobayashi, T., Hamakubo, T., Kasahara, M., Iwata,  
1306 S., Drew, D. (2015) Structure and mechanism of the mammalian fructose transporter GLUT5.  
1307 *Nature* 526, 397-401.
- 1308 144. Caruana, B. T., Byrne, F. L., Knights, A. J., Quinlan, K. G. R., Hoehn, K. L. (2019)  
1309 Characterization of Glucose Transporter 6 in Lipopolysaccharide-Induced Bone Marrow-  
1310 Derived Macrophage Function. *J Immunol* 202, 1826-1832.
- 1311 145. Lam-Yuk-Tseung, S., Picard, V., Gros, P. (2006) Identification of a tyrosine-based motif  
1312 (YGSI) in the amino terminus of Nramp1 (*Slc11a1*) that is important for lysosomal targeting.  
1313 *J Biol Chem* 281, 31677-88.
- 1314 146. Wang, L., Fang, B., Fujiwara, T., Krager, K., Gorantla, A., Li, C., Feng, J. Q., Jennings, M. L.,  
1315 Zhou, J., Aykin-Burns, N., Zhao, H. (2018) Deletion of ferroportin in murine myeloid cells  
1316 increases iron accumulation and stimulates osteoclastogenesis in vitro and in vivo. *J Biol Chem*  
1317 293, 9248-9264.
- 1318 147. Kapetanovic, R., Bokil, N. J., Achard, M. E., Ong, C. L., Peters, K. M., Stocks, C. J., Phan, M.  
1319 D., Monteleone, M., Schroder, K., Irvine, K. M., Saunders, B. M., Walker, M. J., Stacey, K. J.,  
1320 McEwan, A. G., Schembri, M. A., Sweet, M. J. (2016) Salmonella employs multiple  
1321 mechanisms to subvert the TLR-inducible zinc-mediated antimicrobial response of human  
1322 macrophages. *FASEB J* 30, 1901-12.

- 1323 148. Stafford, S. L., Bokil, N. J., Achard, M. E., Kapetanovic, R., Schembri, M. A., McEwan, A. G.,  
1324 Sweet, M. J. (2013) Metal ions in macrophage antimicrobial pathways: emerging roles for zinc  
1325 and copper. *Biosci Rep* 33.
- 1326 149. Xu, H., Ghishan, F. K., Kiela, P. R. (2018) SLC9 Gene Family: Function, Expression, and  
1327 Regulation. *Compr Physiol* 8, 555-583.
- 1328 150. Hume, D. A. and Gordon, S. (1983) Mononuclear phagocyte system of the mouse defined by  
1329 immunohistochemical localization of antigen F4/80. Identification of resident macrophages in  
1330 renal medullary and cortical interstitium and the juxtaglomerular complex. *J Exp Med* 157,  
1331 1704-9.
- 1332 151. Viehmann, S. F., Bohner, A. M. C., Kurts, C., Brahler, S. (2018) The multifaceted role of the  
1333 renal mononuclear phagocyte system. *Cell Immunol*.
- 1334 152. Puranik, A. S., Leaf, I. A., Jensen, M. A., Hedayat, A. F., Saad, A., Kim, K. W., Saadalla, A.  
1335 M., Woollard, J. R., Kashyap, S., Textor, S. C., Grande, J. P., Lerman, A., Simari, R. D.,  
1336 Randolph, G. J., Duffield, J. S., Lerman, L. O. (2018) Kidney-resident macrophages promote a  
1337 proangiogenic environment in the normal and chronically ischemic mouse kidney. *Sci Rep* 8,  
1338 13948.
- 1339 153. Stamatiades, E. G., Tremblay, M. E., Bohm, M., Crozet, L., Bisht, K., Kao, D., Coelho, C.,  
1340 Fan, X., Yewdell, W. T., Davidson, A., Heeger, P. S., Diebold, S., Nimmerjahn, F., Geissmann,  
1341 F. (2016) Immune Monitoring of Trans-endothelial Transport by Kidney-Resident  
1342 Macrophages. *Cell* 166, 991-1003.
- 1343 154. Lee, A. S., Lee, J. E., Jung, Y. J., Kim, D. H., Kang, K. P., Lee, S., Park, S. K., Lee, S. Y.,  
1344 Kang, M. J., Moon, W. S., Kim, H. J., Jeong, Y. B., Sung, M. J., Kim, W. (2013) Vascular  
1345 endothelial growth factor-C and -D are involved in lymphangiogenesis in mouse unilateral  
1346 ureteral obstruction. *Kidney Int* 83, 50-62.
- 1347 155. Himes, S. R., Cronau, S., Mulford, C., Hume, D. A. (2005) The Runx1 transcription factor  
1348 controls CSF-1-dependent and -independent growth and survival of macrophages. *Oncogene*  
1349 24, 5278-86.

- 1350 156. Ginhoux, F., Greter, M., Leboeuf, M., Nandi, S., See, P., Gokhan, S., Mehler, M. F., Conway,  
1351 S. J., Ng, L. G., Stanley, E. R., Samokhvalov, I. M., Merad, M. (2010) Fate mapping analysis  
1352 reveals that adult microglia derive from primitive macrophages. *Science* 330, 841-5.
- 1353 157. Giladi, A. and Amit, I. (2018) Single-Cell Genomics: A Stepping Stone for Future Immunology  
1354 Discoveries. *Cell* 172, 14-21.
- 1355 158. Gunther, P. and Schultze, J. L. (2019) Mind the Map: Technology Shapes the Myeloid Cell  
1356 Space. *Front Immunol* 10, 2287.
- 1357 159. Andrews, T. S. and Hemberg, M. (2018) Identifying cell populations with scRNASeq. *Mol*  
1358 *Aspects Med* 59, 114-122.
- 1359 160. Chen, G., Ning, B., Shi, T. (2019) Single-Cell RNA-Seq Technologies and Related  
1360 Computational Data Analysis. *Front Genet* 10, 317.
- 1361 161. Becht, E., McInnes, L., Healy, J., Dutertre, C. A., Kwok, I. W. H., Ng, L. G., Ginhoux, F.,  
1362 Newell, E. W. (2018) Dimensionality reduction for visualizing single-cell data using UMAP.  
1363 *Nat Biotechnol*. Epub doi: 10.1038/nbt.4314.
- 1364 162. Aitchison, L., Corradi, N., Latham, P. E. (2016) Zipf's Law Arises Naturally When There Are  
1365 Underlying, Unobserved Variables. *PLoS Comput Biol* 12, e1005110.
- 1366 163. Ueda, H. R., Hayashi, S., Matsuyama, S., Yomo, T., Hashimoto, S., Kay, S. A., Hogenesch, J.  
1367 B., Iino, M. (2004) Universality and flexibility in gene expression from bacteria to human. *Proc*  
1368 *Natl Acad Sci U S A* 101, 3765-9.
- 1369 164. Gibbings, S. L., Thomas, S. M., Atif, S. M., McCubbrey, A. L., Desch, A. N., Danhorn, T.,  
1370 Leach, S. M., Bratton, D. L., Henson, P. M., Janssen, W. J., Jakubzick, C. V. (2017) Three  
1371 Unique Interstitial Macrophages in the Murine Lung at Steady State. *Am J Respir Cell Mol*  
1372 *Biol* 57, 66-76.
- 1373 165. Tan, S. Y. and Krasnow, M. A. (2016) Developmental origin of lung macrophage diversity.  
1374 *Development* 143, 1318-27.
- 1375 166. Hume, D. A. (2000) Probability in transcriptional regulation and its implications for leukocyte  
1376 differentiation and inducible gene expression. *Blood* 96, 2323-8.

- 1377 167. Reinius, B., Mold, J. E., Ramskold, D., Deng, Q., Johnsson, P., Michaelsson, J., Frisen, J.,  
1378 Sandberg, R. (2016) Analysis of allelic expression patterns in clonal somatic cells by single-  
1379 cell RNA-seq. *Nat Genet* 48, 1430-1435.
- 1380 168. Zilionis, R., Engblom, C., Pfirschke, C., Savova, V., Zemmour, D., Saatcioglu, H. D., Krishnan,  
1381 I., Maroni, G., Meyerovitz, C. V., Kerwin, C. M., Choi, S., Richards, W. G., De Rienzo, A.,  
1382 Tenen, D. G., Bueno, R., Levantini, E., Pittet, M. J., Klein, A. M. (2019) Single-Cell  
1383 Transcriptomics of Human and Mouse Lung Cancers Reveals Conserved Myeloid Populations  
1384 across Individuals and Species. *Immunity* 50, 1317-1334 e10.
- 1385 169. van Vugt, M. J., Kleijmeer, M. J., Keler, T., Zeelenberg, I., van Dijk, M. A., Leusen, J. H.,  
1386 Geuze, H. J., van de Winkel, J. G. (1999) The FcγRIa (CD64) ligand binding chain  
1387 triggers major histocompatibility complex class II antigen presentation independently of its  
1388 associated FcR γ-chain. *Blood* 94, 808-17.
- 1389 170. Orecchioni, M., Ghosheh, Y., Pramod, A. B., Ley, K. (2019) Macrophage Polarization:  
1390 Different Gene Signatures in M1(LPS+) vs. Classically and M2(LPS-) vs. Alternatively  
1391 Activated Macrophages. *Front Immunol* 10, 1084.
- 1392 171. Jenkins, S. J., Ruckerl, D., Thomas, G. D., Hewitson, J. P., Duncan, S., Brombacher, F.,  
1393 Maizels, R. M., Hume, D. A., Allen, J. E. (2013) IL-4 directly signals tissue-resident  
1394 macrophages to proliferate beyond homeostatic levels controlled by CSF-1. *J Exp Med* 210,  
1395 2477-91.
- 1396 172. Williams, M. and Scott, C. L. (2017) Does niche competition determine the origin of tissue-  
1397 resident macrophages? *Nat Rev Immunol* 17, 451-460.
- 1398 173. T'Jonck, W., Williams, M., Bonnardel, J. (2018) Niche signals and transcription factors  
1399 involved in tissue-resident macrophage development. *Cell Immunol*.
- 1400 174. Geissmann, F., Gordon, S., Hume, D. A., Mowat, A. M., Randolph, G. J. (2010) Unravelling  
1401 mononuclear phagocyte heterogeneity. *Nat Rev Immunol* 10, 453-60.
- 1402 175. Fujiu, K., Shibata, M., Nakayama, Y., Ogata, F., Matsumoto, S., Noshita, K., Iwami, S., Nakae,  
1403 S., Komuro, I., Nagai, R., Manabe, I. (2017) A heart-brain-kidney network controls adaptation  
1404 to cardiac stress through tissue macrophage activation. *Nat Med* 23, 611-622.

- 1405 176. Wolf, Y., Boura-Halfon, S., Cortese, N., Haimon, Z., Sar Shalom, H., Kuperman, Y.,  
1406 Kalchenko, V., Brandis, A., David, E., Segal-Hayoun, Y., Chappell-Maor, L., Yaron, A., Jung,  
1407 S. (2017) Brown-adipose-tissue macrophages control tissue innervation and homeostatic  
1408 energy expenditure. *Nat Immunol* 18, 665-674.
- 1409 177. Shemer, A., Grozovski, J., Tay, T. L., Tao, J., Volaski, A., Suss, P., Ardura-Fabregat, A., Gross-  
1410 Vered, M., Kim, J. S., David, E., Chappell-Maor, L., Thielecke, L., Glass, C. K., Cornils, K.,  
1411 Prinz, M., Jung, S. (2018) Engrafted parenchymal brain macrophages differ from microglia in  
1412 transcriptome, chromatin landscape and response to challenge. *Nat Commun* 9, 5206.
- 1413 178. Li, Q., Cheng, Z., Zhou, L., Darmanis, S., Neff, N. F., Okamoto, J., Gulati, G., Bennett, M. L.,  
1414 Sun, L. O., Clarke, L. E., Marschallinger, J., Yu, G., Quake, S. R., Wyss-Coray, T., Barres, B.  
1415 A. (2019) Developmental Heterogeneity of Microglia and Brain Myeloid Cells Revealed by  
1416 Deep Single-Cell RNA Sequencing. *Neuron* 101, 207-223 e10.
- 1417 179. Rauschmeier, R., Gustafsson, C., Reinhardt, A., N, A. G., Tortola, L., Cansever, D.,  
1418 Subramanian, S., Taneja, R., Rossner, M. J., Sieweke, M. H., Greter, M., Mansson, R.,  
1419 Busslinger, M., Kreslavsky, T. (2019) Bhlhe40 and Bhlhe41 transcription factors regulate  
1420 alveolar macrophage self-renewal and identity. *EMBO J* 38, e101233.
- 1421 180. Jaitin, D. A., Adlung, L., Thaïss, C. A., Weiner, A., Li, B., Descamps, H., Lundgren, P., Bleriot,  
1422 C., Liu, Z., Deczkowska, A., Keren-Shaul, H., David, E., Zmora, N., Eldar, S. M., Lubezky,  
1423 N., Shibolet, O., Hill, D. A., Lazar, M. A., Colonna, M., Ginhoux, F., Shapiro, H., Elinav, E.,  
1424 Amit, I. (2019) Lipid-Associated Macrophages Control Metabolic Homeostasis in a Trem2-  
1425 Dependent Manner. *Cell* 178, 686-698 e14.
- 1426 181. Thion, M. S., Low, D., Silvin, A., Chen, J., Grisel, P., Schulte-Schrepping, J., Blecher, R., Ulas,  
1427 T., Squarzoni, P., Hoeffel, G., Couplier, F., Siopi, E., David, F. S., Scholz, C., Shihui, F., Lum,  
1428 J., Amoyo, A. A., Larbi, A., Poidinger, M., Buttgerit, A., Lledo, P. M., Greter, M., Chan, J.  
1429 K. Y., Amit, I., Beyer, M., Schultze, J. L., Schlitzer, A., Pettersson, S., Ginhoux, F., Garel, S.  
1430 (2018) Microbiome Influences Prenatal and Adult Microglia in a Sex-Specific Manner. *Cell*  
1431 172, 500-516 e16.

1432 182. Stock, A. T., Collins, N., Smyth, G. K., Hu, Y., Hansen, J. A., D'Silva, D. B., Jama, H. A., Lew,  
1433 A. M., Gebhardt, T., McLean, C. A., Wicks, I. P. (2019) The Selective Expansion and Targeted  
1434 Accumulation of Bone Marrow-Derived Macrophages Drive Cardiac Vasculitis. *J Immunol*  
1435 202, 3282-3296.  
1436  
1437  
1438



1439 **Table 1.** GEO and BioProject accession numbers for samples used in the analysis.

1440

| Accession   | BioProject      | Reference | Description (markers used)                                                                                      |
|-------------|-----------------|-----------|-----------------------------------------------------------------------------------------------------------------|
| GSE125691   | PRJNA<br>517169 | [25]      | Interstitial subsets from lung, skin, fat, heart + monocytes and alveolar macs (LYVE1, SiglecF).                |
| GSE84586    | PRJNA<br>330530 | [175]     | Resident macrophages from heart, kidney, and liver (F4/80, CD11b).                                              |
| GSE94135    | PRJNA<br>369038 | [164]     | Three interstitial subsets from lung (Mertk, CD64, CD11b, CD11c, CD206, MHCII) + alveolar macs.                 |
| GSE95859    | PRJNA<br>378611 | [176]     | Brown adipose macrophages (Cx3cr1).                                                                             |
| GSE114434   | PRJNA<br>471340 | [34]      | Monocytes and small intestinal macrophage subsets (CD4, TIM4, CD64)                                             |
| GSE116094   | PRJNA<br>478258 | [152]     | Kidney resident and monocyte-derived subpopulations, effect of ischaemia. (F4/80, CD64, CD11c, CD11b, MHCII)    |
| GSE122766   | PRJNA<br>506249 | [177]     | Brain microglia, bone marrow-derived brain macrophages. (CD45, CD11b, CX3CR1)                                   |
| GSE123021   | PRJNA<br>507265 | [178]     | Brain microglia, cortex, cerebellum, hippocampus, striatum (Tmem119)                                            |
| GSE127980   | PRJNA<br>525977 | [131]     | Erythroblastic island macrophages from marrow (Epor-EGFP, F4/80, VCAM1, SIGLEC1)                                |
| GSE135018   | PRJNA<br>557178 | [179]     | Alveolar macrophages and peritoneal macrophages, effect of bHLHe40/41 mutation. (SIGLECF, CD11b, CD11c, F4/80). |
| GSE128662   | PRJNA<br>528430 | [32]      | Monocyte to Kupffer cell differentiation series (F4/80, CD11b, LY6C, CLEC4F)                                    |
| GSE128781   | PRJNA<br>529096 | [124]     | Non-parenchymal brain macrophages, microglia and peritoneal macrophages (MHCII, CD64, CD11b)                    |
| E-MTAB-6977 | PRJEB<br>27719  | [33]      | Macrophage subsets from intestinal lamina propria, serosa and muscularis. (CD64, Cx3cr1 lineage trace)          |

|           |                 |       |                                                                                                                  |
|-----------|-----------------|-------|------------------------------------------------------------------------------------------------------------------|
| GSE112002 | PRJNA<br>438927 | [130] | Pancreatic islet and peri-islet macrophage populations. Effect of high-fat diet. (F4/80, CD11b, CD11c)           |
| GSE103847 | PRJNA<br>407286 | [125] | White adipose and sympathetic neuron-associated macrophages, spleen, microglia. (CD45, Cx3cr1-EGFP, F4/80)       |
| GSE68789  | PRJNA<br>283850 | [93]  | Mucosal and skin Langerhans cells and DC. (CD103, CD11b, EpCAM, Cd207)                                           |
| GSE128518 | PRJNA<br>527979 | [180] | White adipose macrophages, effect of Trem2 KO. (CD11b, F4/80)                                                    |
| GSE107130 | PRJNA<br>419127 | [181] | Brain microglia developmental time course: male and female. Role of microbiome (CD45, CD11b, F4/80, CD64)        |
| GSE83222  | PRJNA<br>325288 | [132] | Spleen, intestine, bone marrow macrophages. Effect of engulfment of apoptotic cells. (F4/80, CD11b).             |
| GSE95702  | PRJNA<br>378162 | [118] | Monocytes and bone marrow progenitors. CD115, CD135, Ly6C, Cd11b, CD11c                                          |
| GSE130201 | PRJNA<br>534273 | [133] | Dendritic cells, lymph node and spleen. cDC1/cDC2.(CD11c, CD64, MHCII, CD103, Tbx21)                             |
| GSE120012 | PRJNA<br>491337 | [182] | Cardiac vessel macrophages. MHCII, CCR2, CD64, CD11b                                                             |
| GSE140919 | PRJNA<br>519465 | [95]  | Monocyte engraftment of colon/ileum. Cx3cr1-EGFP, CD115, LY6C, CD64                                              |
| GE131751  | PRJNA<br>544681 | [111] | Kidney resident and monocyte-derived macrophage and DC. (F4/80, CD64, CD11c, CD11b, MHCII, Clec9A lineage trace) |

1441

1442 **Table 2.** Description of major functional clusters of coexpressed genes in mouse MPS cell samples.

1443 Genes in red are key cell surface markers; genes in blue are transcription factors

1444

| Cluster number | Description                     | Representative genes                                                                                                                                                                                                                                                                                                                                                                                                                                                                          |
|----------------|---------------------------------|-----------------------------------------------------------------------------------------------------------------------------------------------------------------------------------------------------------------------------------------------------------------------------------------------------------------------------------------------------------------------------------------------------------------------------------------------------------------------------------------------|
| 1              | MPS                             | <i>Acp2, Atp6 subunits, Cd276, Cd53, Cd68, Cd84, Clec5a, Cln5/8, Csf1r, Ddx /Dhx family, Fcgr1, Gpr107/108, Hk3, lysosomal enzymes, Ifngr1/2, Il10ra, Il13ra1, Il6ra, Irak1/2, Jak1/3, Lamp1/2, Lgals8/9, M6pr, P2ry6, P2rx7, Sirpa, Tlr6/7/8, Tnfrsf11a, Cebpg, Creb3, Crebzf, Efl1, Etv5, Fli1, Foxj2, Foxn3, Foxo1, Gabpa, Hdac3/10, Hif1a, Hsf1, Klf3, Maf1, Mafg, Mitf, Nfatc1, Nfx1, Nfyc, Nr1h2, Nr2c1, Nr2f6, Nr3c1, Prdm4, Rela, Smad1/2/4, Sp3, Spi1, Srebf1, Stat6, Tcf3, Tfe3</i> |
| 3              | MPS                             | <i>Abca1/2, Aim2, Akt2/3, Arrb1, Arrb2, Atxn7, Bak1, Cbl, Cd180, Cdk8/10/12/13/19, Csk, Ddi2, Ddx3/6/17/19a/21/23/39b/46, Dhx9/15, Grk2, H6pd, Ly9, Megf8, Mertk, Mpeg1, Naip2/5/6, Nirp1b, Ptprij, Socs4/7, Syk, Taok1/2, Traf7, Tram2, Atf1, Bach1, Bcor, Cebpa, Elf2/4, Erf, Foxk1, Foxk2, Foxo3, Foxo4, Fus, Hsf2, Ikzf1, Maf, Maz, Mef2d, Ncoa3, Ncoa6, Nfat5, Nfatc3, Nfya, Pbx2, Prdm2, Smad5</i>                                                                                      |
| 4              | Microglia and brain macrophages | <i>Abi3, Acvr1, Adrb2, Bcl9, Bmp1/2k, Card6, Ccr5, Cd34, Csf3r, Cx3cr1, Cxxc5, Ddx31/43, Entpd1, Fcrls, Fgf13, Gabbr1, Gpr155, Gpr165, Gpr34, Hexb, Itgb3/b5, Lpcat1/2/3, Mrc2, Nckap5l, Olfm13, P2ry12/13, Paqr7, Plexna4, Nanos1, Siglech, Slc1a3/4, Slco2b1, Slc2a5, Sipal, Tgfbr1, Tmem119, Tmem173, Trem2, Vav1, Vsir, Bhlhb9, Ebf3, Elk3, Ets1, Hivep3, Lefty1, Mef2c, Prox2, Sall1/2/3, Sox4</i>                                                                                       |
| 7              | Mitochondria and ribosome       | <i>Atp5e/g2/h/j/2/l, Cox5b/6a1/6b1, Mrpl family, Nduf family, Rpl and Rps families</i>                                                                                                                                                                                                                                                                                                                                                                                                        |
| 9              | Cell cycle                      | <i>Aurka, Aurkb, Birc5, Bub1, Ccna2/b1/b2/e2, Cdk1, Cenpe, Haus family, Kif family, Mcm family, Plk1, Foxm1, Mybl2</i>                                                                                                                                                                                                                                                                                                                                                                        |

|    |                                                                 |                                                                                                                                                                                                                                                                                                |
|----|-----------------------------------------------------------------|------------------------------------------------------------------------------------------------------------------------------------------------------------------------------------------------------------------------------------------------------------------------------------------------|
| 10 | Lung macrophages                                                | <i>Anxa2, Atxn10, Car4, Cd2, Cd200r4, Cd9, Chil3, Ctsk, Cx3C11, Cxcr1, F7, Fabp1, Ffar4, Flt1, Flvcr2, Gal, Htr2c, Igflr1, Illrn, Lpl, Ly75, Nceh1, P2rx5, Plscr1, Serpine1, Siglecf, Slc6a4, Tmem138, Nlr1, Pparg, Tcf7l2</i>                                                                 |
| 12 | Liver Kupffer cell, peritoneal and splenic red pulp macrophages | <i>Acp5, Adgre4, Apoc1, C6, Cd5l, Cdh5, Clec1b, Clec4f, Fabp7, Fcgr4, Ill8bp, Itga9, Kcna2Lrp5, Ly9, Pecaml, Pira1/2, Ptger1, Ptprij, Scarb1, Scarf1, Sema6d, Siglec1, Siglece, Slc11a1, Slc40a1, Slc1a2, Stab2, Tmem65, Trem14, Trpm2, Vsig4, Elkl, Id3, Nr1h3, Rxra, Smad6, Thrb, Zbtb4</i>  |
| 13 | CCR7 dendritic cells                                            | <i>Arc, Birc2, Cacnb3, Cblb, Ccl19, Ccl22, Ccr7, Cd1d1, Cd200, Cd40, Cd70, Dpp4, Fas, Icosl, Glipr2, Gpr68, Heatr9, H2-Q6/7/8/9, Ill5, Ill5ra, Itgb8, Laptm4b, Lrrk1, Slamf1, Socs2, Tank, Tmem19, Tnfrsf4, Tnfrsf9, Traf1, Tyk2, Vsig10, Zc3h12c, Zmynd15, Foxh1, Id2, Ikzf4, Spib, Stat4</i> |
| 15 | Monocytes                                                       | <i>C3, Camkk2, Ccr2, Cd177, Cd244a, Celsr3, Clec2g, Erbb4, Fgr, Gpr15, Gpr35, Gpr141, Hpse, Ill7ra, Itga4, Met, Mmp8, Ms4a4c, Nlrc5, Ptgir, Ptprc, Sell, Sgms2, Slk, Vcan, E2f2, Foxn2, Jarid2, Rara, Rfx2, Stat2</i>                                                                          |
| 21 | Peritoneal macrophages                                          | <i>Ackr3, Alox15, Arg1, C4a/b, Car6, Cyp26a1, F5, F10, Fgfr1, Fzd1, Icam2, Itga6, Itgam, Jag1, Lbp, Lrg1, Mst1r, Naip1, Nt5e, Padi4, Pycard, Selp, SerpinB2, Slpi, Tgfb2, Thbs1, Wnt2, Gata6, Rarb, Smad3, Sox7, Tox2</i>                                                                      |
| 22 | LYVE1-positive macrophages                                      | <i>Adam9, C3ar1, C5ar1, Cd36, Cfj, Clcn5, Ctsb, Dab2, Egfr, Epor, F13a1, Fcgrt, Frmd6, Gas6, Gpr160, Igfbp4, Lyve1, Mrcl, Nrp1, Slpr1/2, Thr5, Tmem9, Trf, Trpv4, Etv1, Nfatc2, Tcf4</i>                                                                                                       |
| 28 | Dendritic cells                                                 | <i>Adam11, Bcl2a1b/d, Ccr6, Cd7, Clec4a4, Ddr1, Dtx1, Flt3, H2-DMb2, H2-Eb2, H2-Oa/b, Kit, Lta/b, Nlrp10, P2ry10, Siglecg, Sirpb1a, Tnfrsf18, Relb</i>                                                                                                                                         |
| 38 | Intestinal macrophages                                          | <i>Adam19, Asb2, Cxcl9, Cxcr4, Dna113, Fgl2, Gpr31b, Gpr55, Ill0, Ill2rb1, Kynu, Mmp9/13/14, Ocstamp, P2rx6, Pgf, Tlr12, Wnt4, Fosb, Hes1, Hic1</i>                                                                                                                                            |

|     |                       |                                                                                                                                   |
|-----|-----------------------|-----------------------------------------------------------------------------------------------------------------------------------|
| 41  | Immediate early genes | <i>Ccr12, Dusp1, Mcl1, Tnfrsf3, Trib1, Zfp36, Atf3, Egr1, Fos, Ier2/5, Jun, Junb, Jund, Klf2, Klf6, Nfe2l2, Nfkbiz, Tgif1</i>     |
| 43  | Langerhans cells      | <i>Cd207, Dkk1, Dpep3, Hapin3, Il1r2, Mfge8, P2rx2, P2rx5, Plek2, Sema7a, Serpind1, Tnfrsf2</i>                                   |
| 49  | cDC1 dendritic cells  | <i>Cd8a, Clec4b2, Clnk, Ctla4, Gcsam, Gpr33, Gpr141b, Gpr171, Ildr1, Itgae, Il12b, P2ry14, Procr, Plekha5, Tlr11, Xcr1, Ncoa7</i> |
| 165 | Class II MHC          | <i>Cd74, H2-Aa, H2Ab1, H2-DMA/b1, H2-Eb1, Ciita</i>                                                                               |

1445

1446

1447 **Table 3.** Major contaminant clusters. Genes in blue are transcription factors

1448

| Cluster number | Description                                    | Representative genes                                                                                                                                                                         |
|----------------|------------------------------------------------|----------------------------------------------------------------------------------------------------------------------------------------------------------------------------------------------|
| 2              | General neuronal contamination                 | <i>Cacna</i> family, <i>Cdh</i> family, <i>Chrn</i> family, <i>Gabrg1/g2</i> , <i>glutamate receptors</i> etc.                                                                               |
| 5 and 17       | Intestinal epithelial                          | <i>Multiple solute carriers</i> , <i>Cdx1/2</i> , <i>Hox</i> family, <i>Isx</i> , <i>Ihh</i>                                                                                                 |
| 8 and 14       | Kidney epithelia                               | <i>Pax8</i> , <i>Cldn4/8</i> , <i>Hnf1b</i> , <i>Hoxb2/7</i>                                                                                                                                 |
| 16             | Hepatic parenchymal cells                      | <i>Alb</i> , <i>C8/9</i> , <i>Cyp2</i> family, <i>Igfbp1</i> , <i>Serpina1</i> , <i>Nr113</i>                                                                                                |
| 18             | Pancreatic islets                              | <i>Ins1</i> , <i>Gcg</i> , <i>Isl1</i>                                                                                                                                                       |
| 26             | Skin/keratinocytes                             | <i>Krt4/5/6</i> , <i>Stfn</i> , <i>Pitx1/2</i>                                                                                                                                               |
| 32             | Bone marrow specific, neutrophil contamination | <i>Elane</i> , <i>Camp</i> , <i>Fcer1a</i> , <i>Gpc1</i> , <i>M6s4a3</i> , <i>Mpo</i> , <i>Prg2/3</i> , <i>S100a8</i> , <i>S100a9</i> <i>Gata2</i> , <i>Gfi1</i> , <i>Cebpe</i> , <i>Myb</i> |
| 33             | Immature erythroid                             | <i>Hemgn</i> , <i>Klf1</i>                                                                                                                                                                   |
| 36             | Neuronal                                       | <i>Tnfrsf14</i> , <i>Pax6</i> , <i>Sox8</i>                                                                                                                                                  |
| 45             | Pancreatic acinar cells                        | <i>Cel</i> , <i>Cpa1</i> , <i>Ctrb1</i> , <i>Pnlip</i>                                                                                                                                       |
| 65             | Smooth muscle (intestine muscularis)           | <i>Acta2</i> , <i>Cnn1</i> , <i>Des</i> , <i>Mylk</i> , <i>Tpm1</i> , <i>Nkx3-2</i>                                                                                                          |
| 67             | NK cells                                       | <i>Cd3g</i> , <i>Cd160</i> , <i>Gzma/b/c</i> , <i>Il2rb</i> , <i>Itga2</i> , <i>Kirg1</i> , <i>Klra4/7/8/9</i> , <i>Klrc2/3</i> , <i>Ncr1</i>                                                |
| 76             | Endothelial                                    | <i>Adgrf5</i> , <i>Clec4g</i> , <i>Ehd3</i> , <i>Flt4</i> , <i>Kdr</i> , <i>Ptprb</i> , <i>Robo4</i> , <i>Tie1</i> , <i>Sox18</i> , <i>Gata4</i>                                             |
| 87             | B cells                                        | <i>Blk</i> , <i>Cd19</i> , <i>Cd79a</i> , <i>Cxcr5</i> , <i>Fcer2a</i> , <i>Fcgr</i> , <i>Itk</i> , <i>Lax1</i> , <i>Tnfrsf13c</i> , <i>Mef2b</i>                                            |

1449

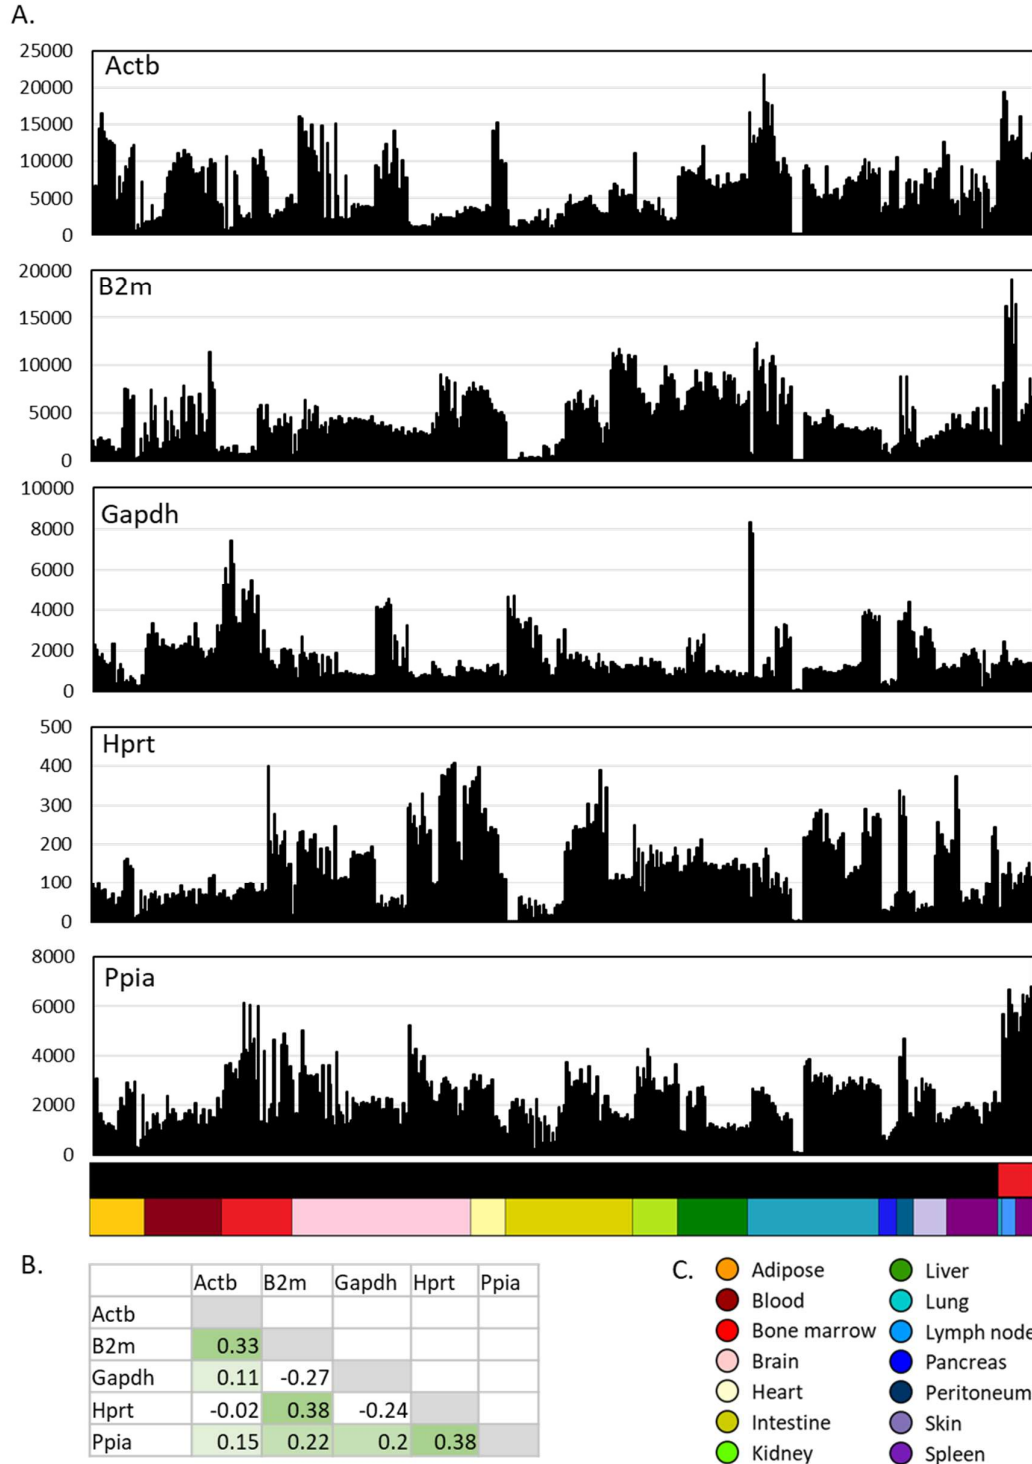

1450

1451 **Figure 1.** Expression of housekeeping genes across MPS cell populations.

1452 **A.** Expression patterns across cells from different tissues.

1453 **B.** Correlations (Pearson correlation coefficient) between expression patterns of different  
1454 housekeeping genes.

1455 **C.** Colour code for tissue sources (lower bar, X axis). Upper bar shows cell type: black – macrophage;  
1456 red – DC.

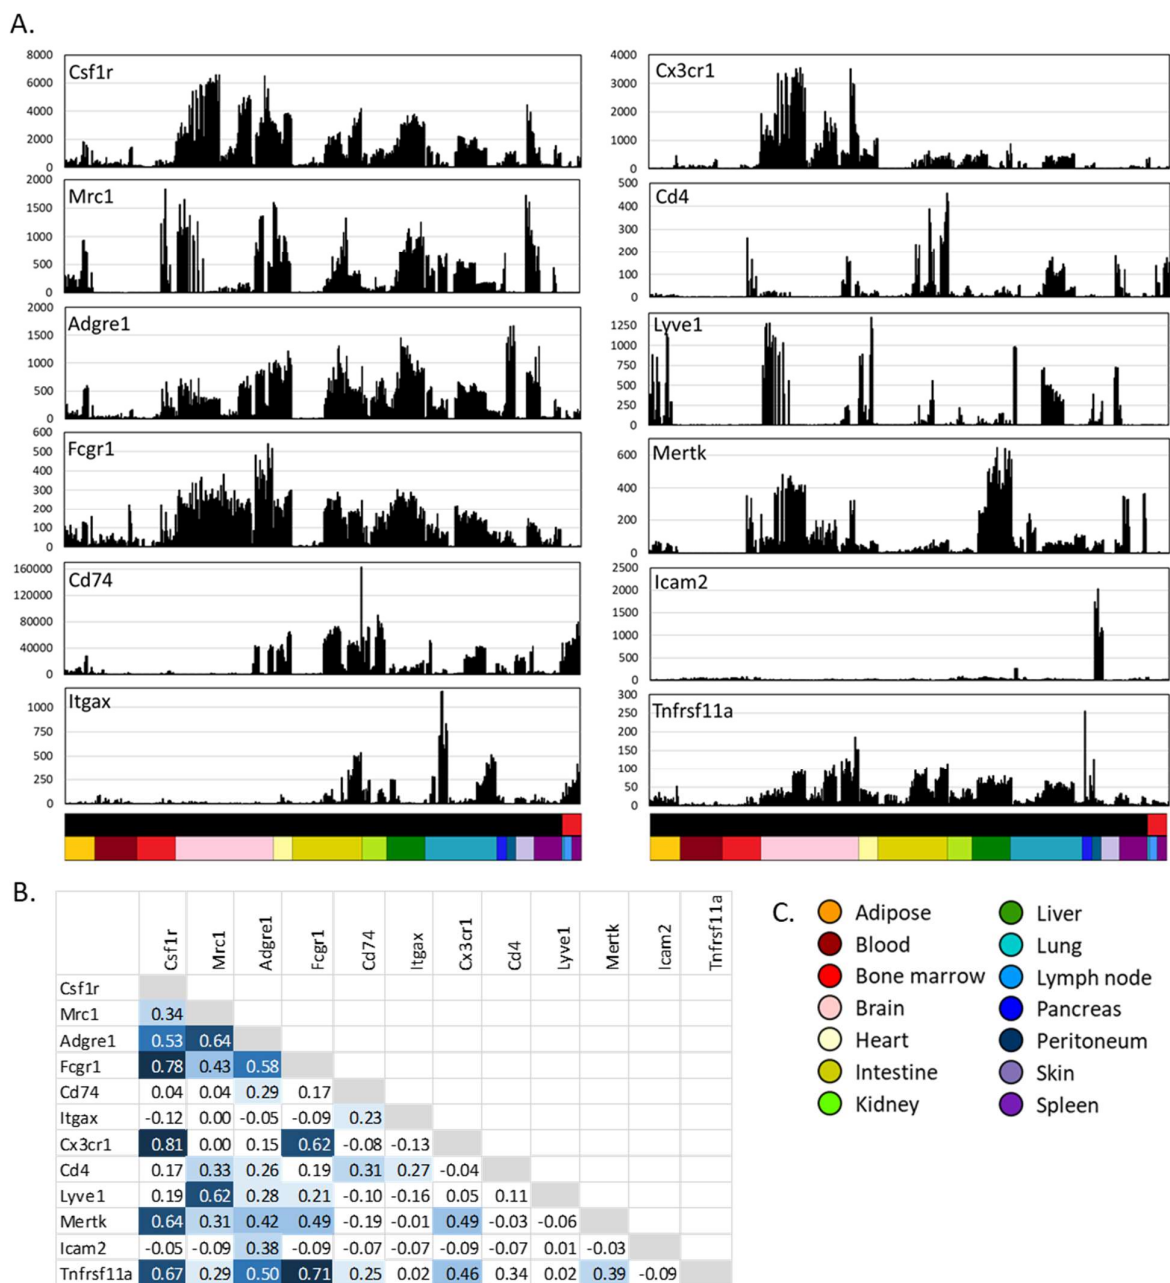

1457

1458 **Figure 2.** Expression of cell surface marker genes across MPS populations.

1459 **A.** Expression patterns across cells from different tissues.

1460 **B.** Correlations (Pearson correlation coefficient) between expression patterns of different MPS genes.

1461 **C.** Colour code for tissue sources (lower bar, X axis). Upper bar shows cell type: black – macrophage;

1462 red – DC.



A.

Source tissue

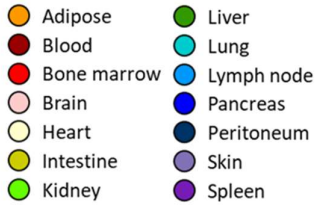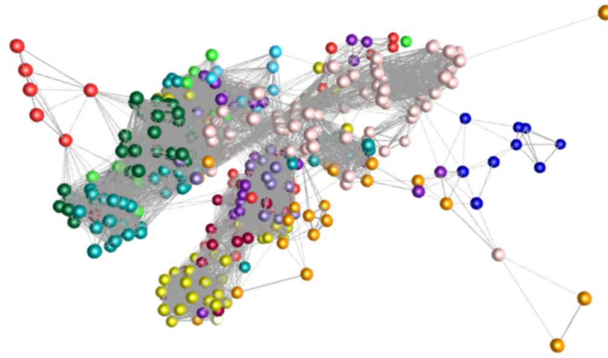

B.

Cell type

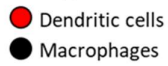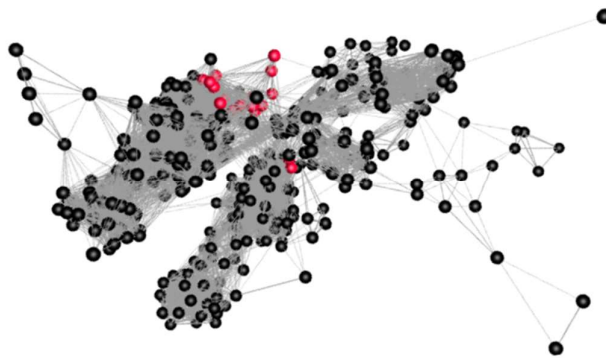

C.

BioProject

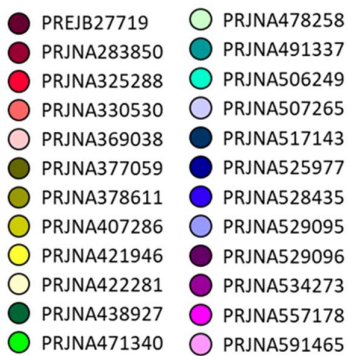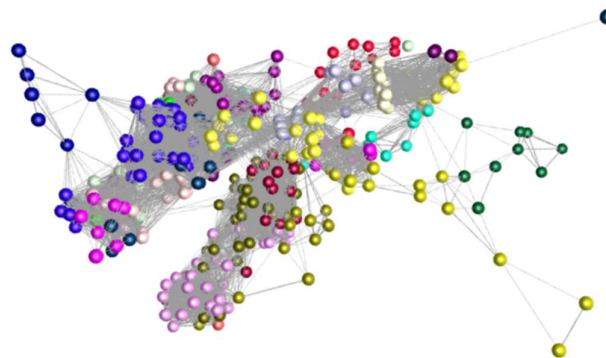

1463

1464

1465

**Figure 3.** Sample-to-sample network analysis of gene expression in MPS cell populations.

1466

Each sphere (node) represents a sample and lines between them (edges) show Pearson correlations

1467

between them of  $\geq 0.68$  (the maximum value that included all 446 samples).

1468

**A.** Samples coloured by recorded cell type.

1469

**B.** Samples coloured by tissue of origin.

1470

**C.** Samples coloured by BioProject.

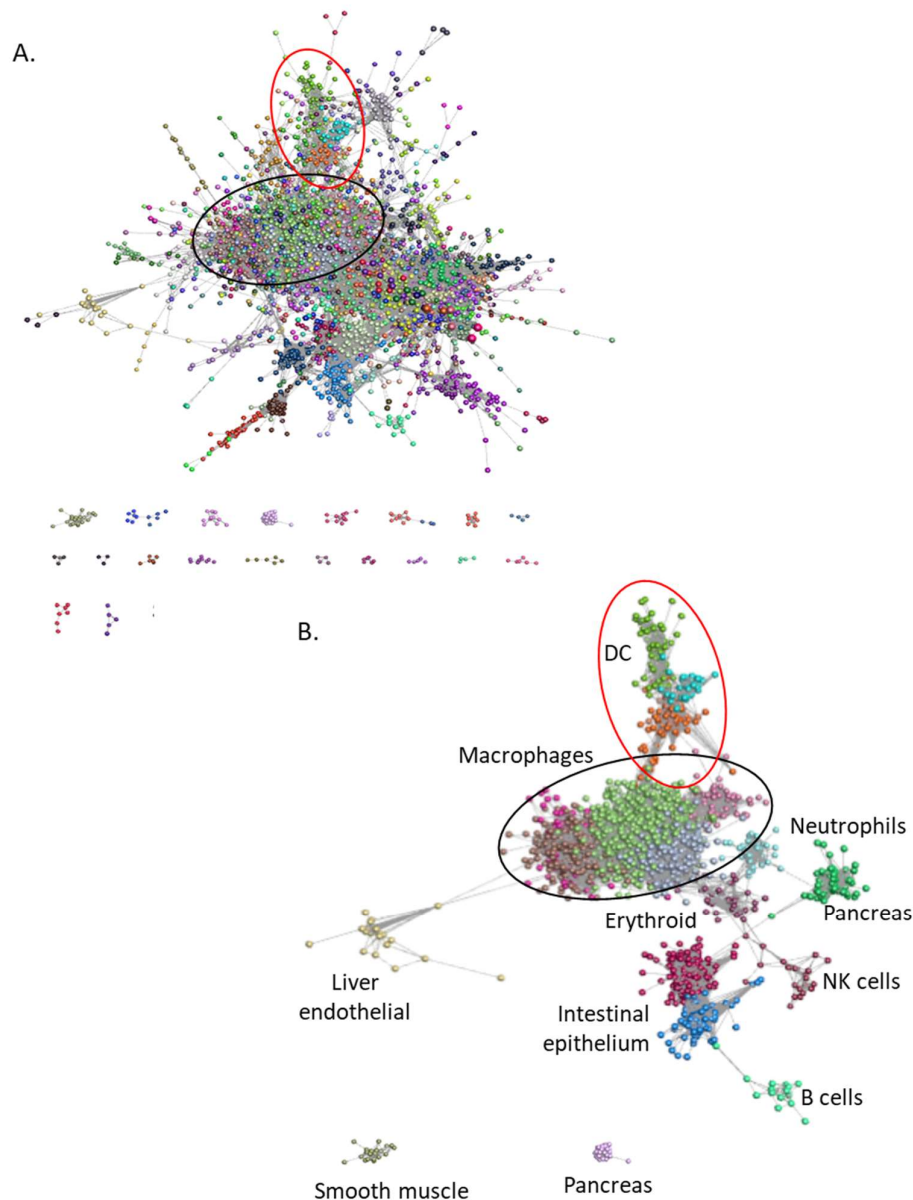

1471

1472

1473 **Figure 4.** Gene centred network analysis of gene expression in MPS cell populations.

1474 Each sphere (node) represents a gene and lines between them (edges) show Pearson correlations  
1475 between them of  $\geq 0.75$ . Nodes were grouped into clusters with related expression patterns using the  
1476 MCL algorithm with an inflation value of 1.7. Lists of genes and expression profiles of clusters are  
1477 presented in **Table S2**.

1478 **A.** The network generated by the Graphia analysis. Nodes are coloured by MCL cluster. Lists of  
1479 genes in all clusters are presented in **Table S2**. Macrophage genes (black oval), DC genes (red oval).

1480 **B.** Network showing only major clusters of macrophage genes (black oval), DC genes (red oval) and  
1481 other cell types.

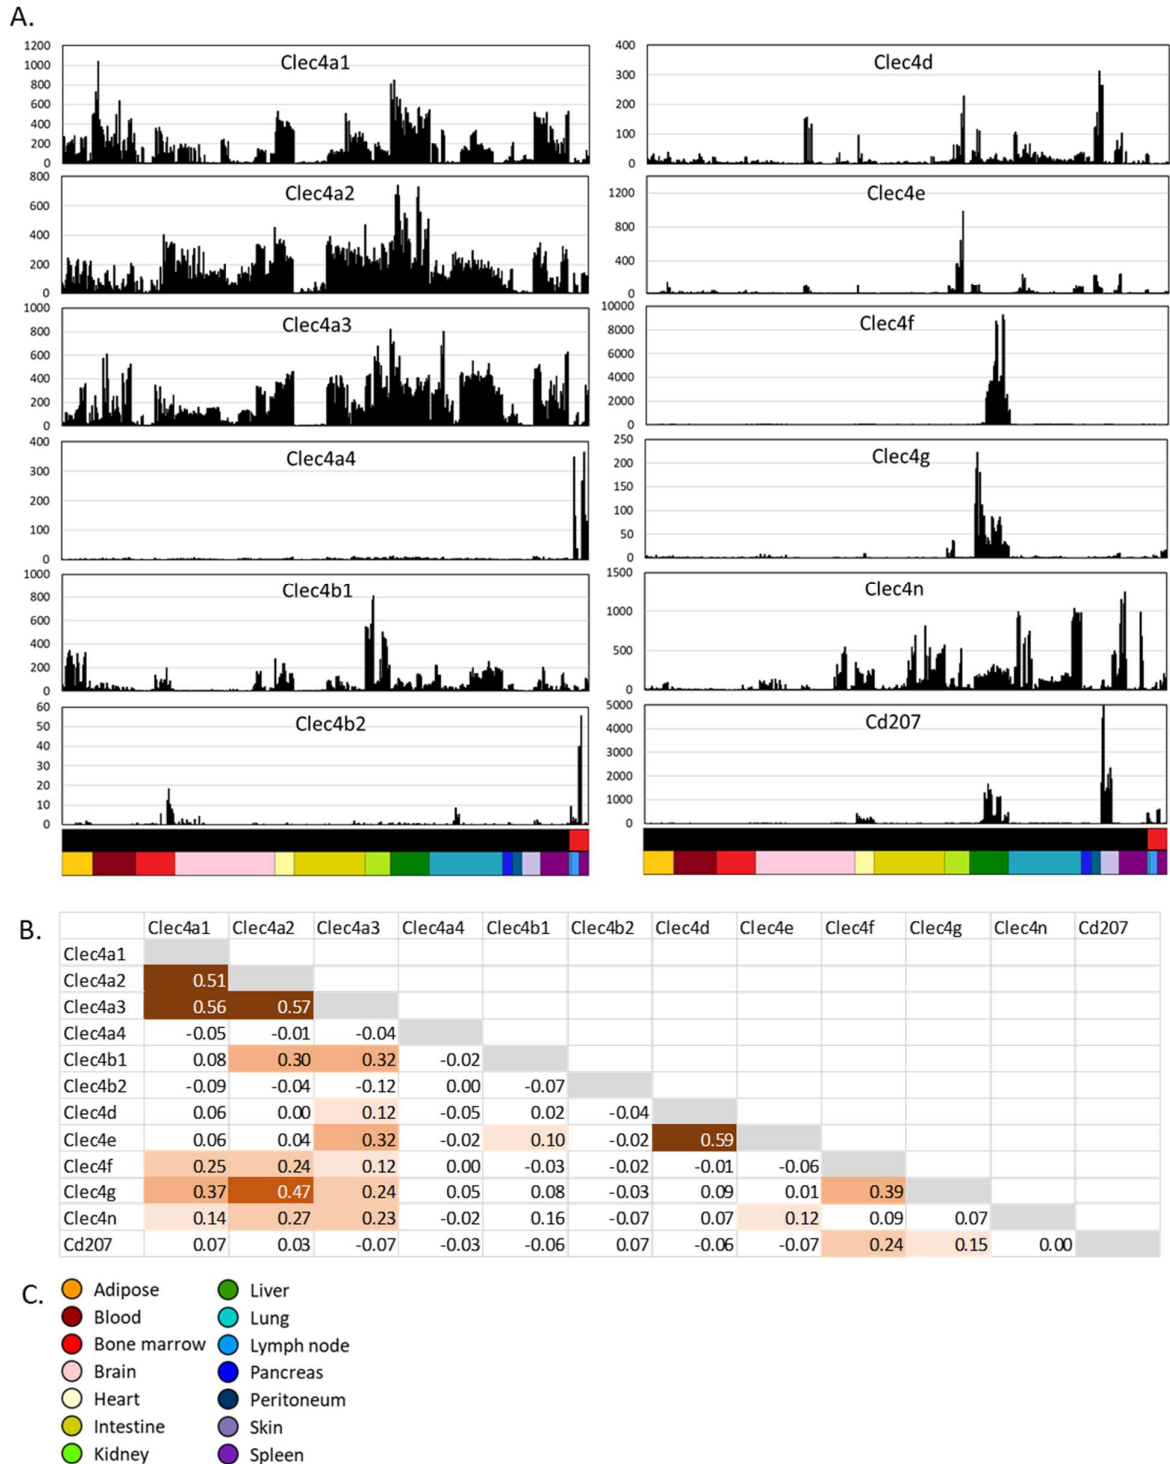

1482

1483 **Figure 5.** Expression of members of the dendritic cell immunoreceptor (Clec4) family across MPS  
 1484 cell populations.

1485 **A.** Expression patterns across cells from different tissues.

1486 **B.** Correlations (Pearson correlation coefficient) between expression patterns of different Clec4 genes.

1487 **C.** Colour code for tissue sources (lower bar, X axis). Upper bar shows cell type: black – macrophage;  
 1488 red – DC.

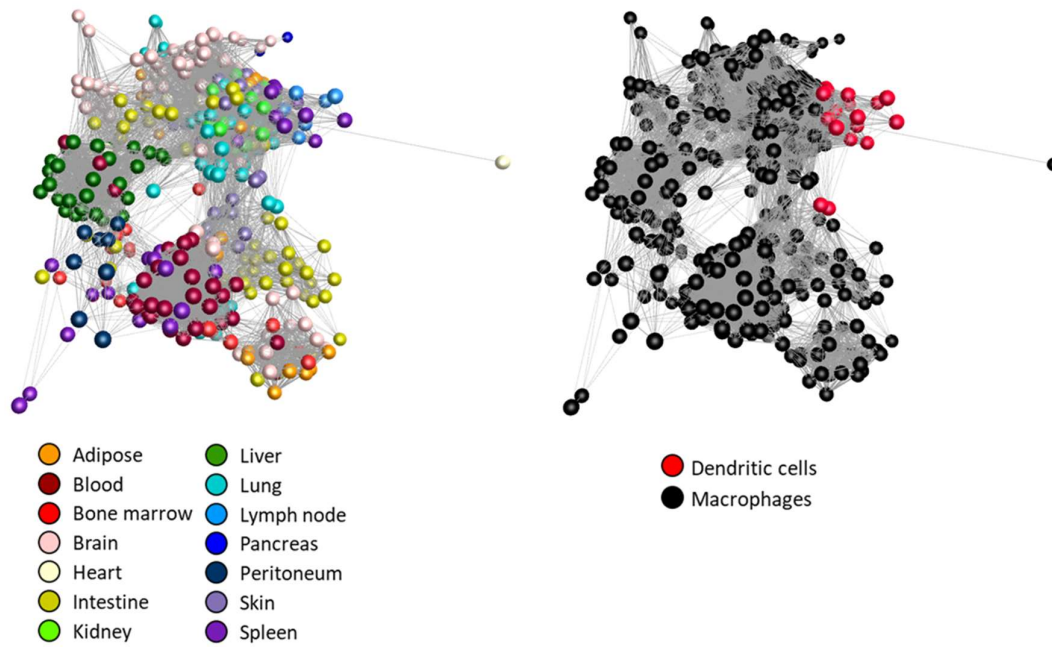

1489

1490 **Figure 6.** Network analysis of transcription factor gene expression in MPS cell populations.

1491 The sample-to-sample network was generated by Graphia analysis, at  $r \geq 0.66$ , which included all 466

1492 samples. Nodes representing samples are coloured by source tissue (left) and cell type (right).

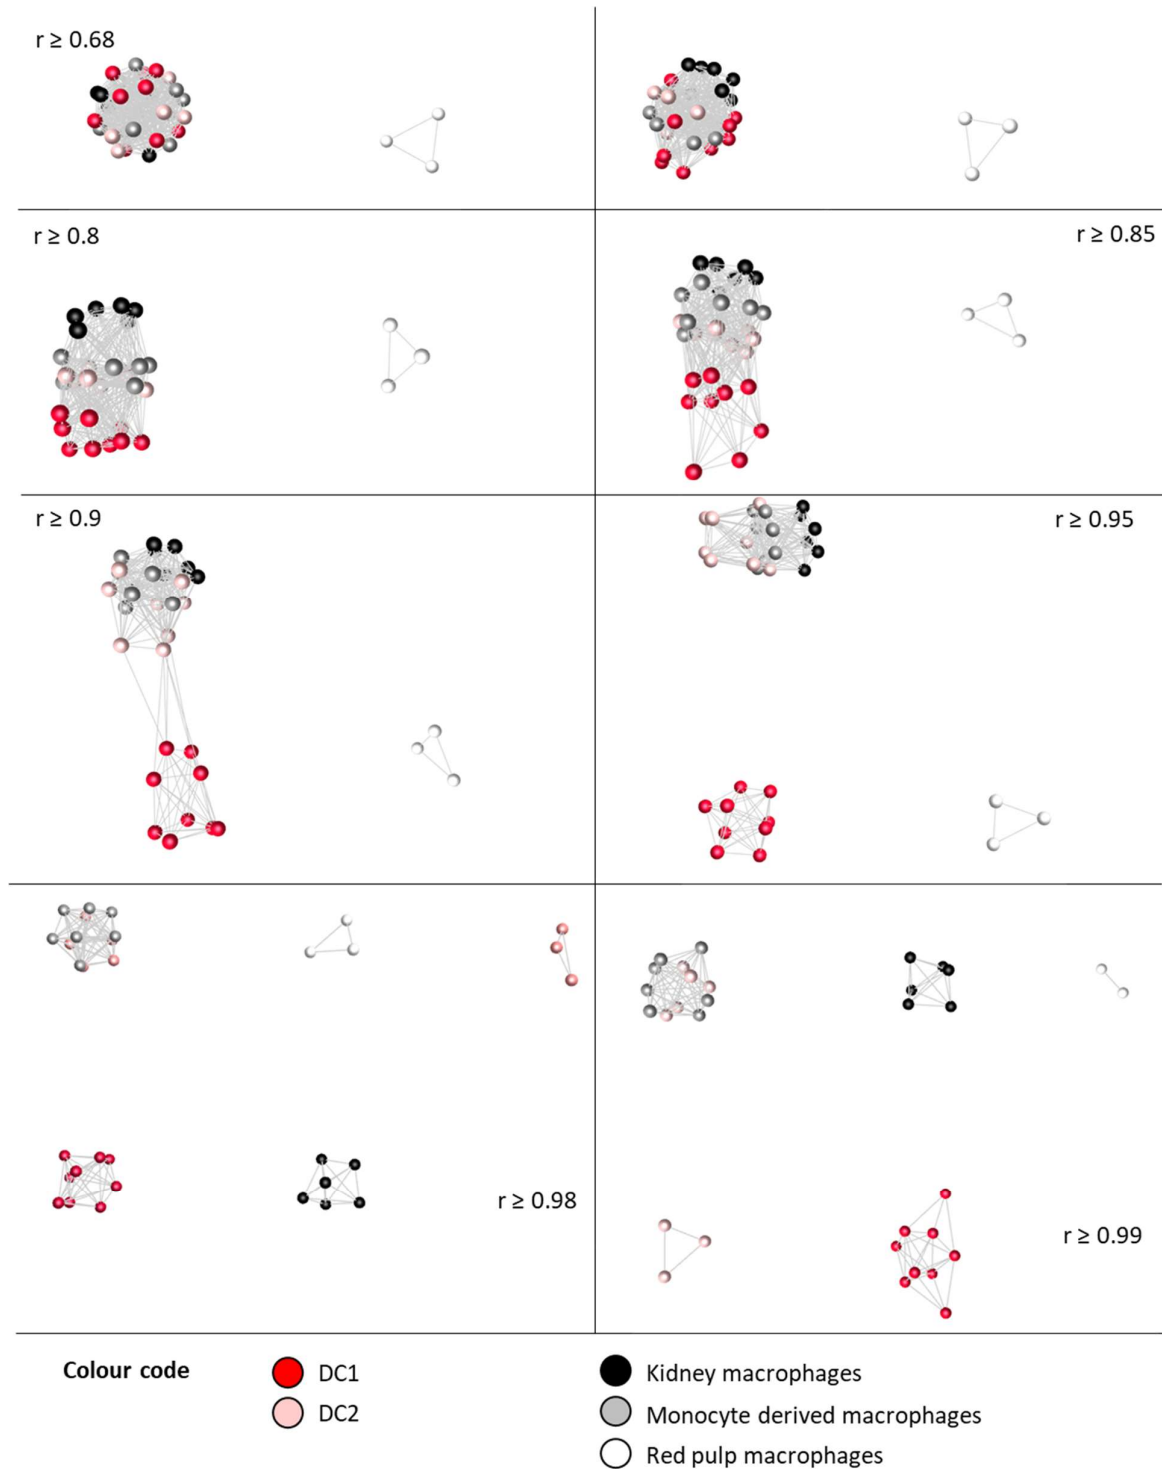

1493

1494

1495 **Figure 7.** Network analysis of gene expression in macrophage and DC subpopulations from kidney.  
 1496 The sample-to-sample network was generated by Graphia analysis, at the indicated  $r$  values which all  
 1497 included all 33 samples up to  $r \geq 0.98$ . At  $r \geq 0.98$  one red pulp macrophage sample was lost.

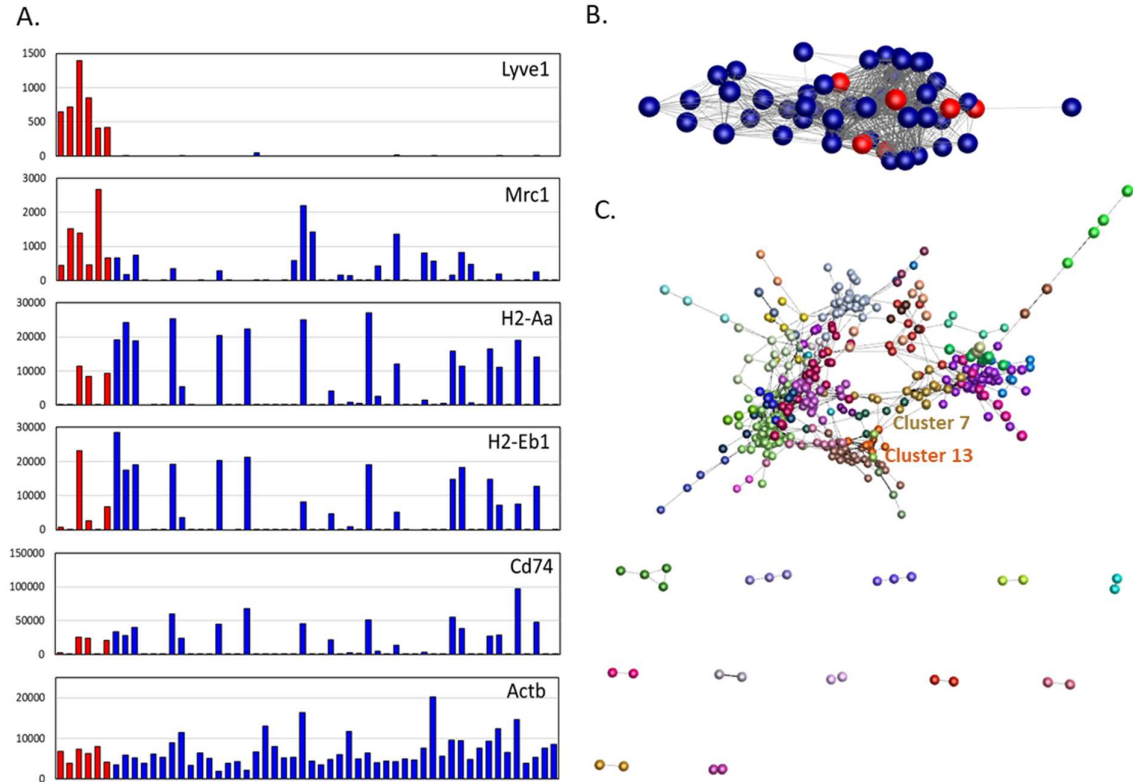

1498

1499 **Figure 8.** Network analysis of single cell RNA-seq data.

1500 **A.** Expression profiles in single cells for selected genes. Only the first six cells expressed *Lyve1*  
1501 (coloured red).

1502 **B.** The sample-to-sample network was generated by Graphia analysis, at  $r \geq 0.53$ , which included all  
1503 54 samples. Nodes represent samples; red nodes show the samples with high expression of *Lyve1*.

1504 **C.** Gene-to-gene network ( $r \geq 0.5$ ), clustered at MCL inflation value of 1.7. Cluster lists and  
1505 expression profiles are available in **Table S6**.

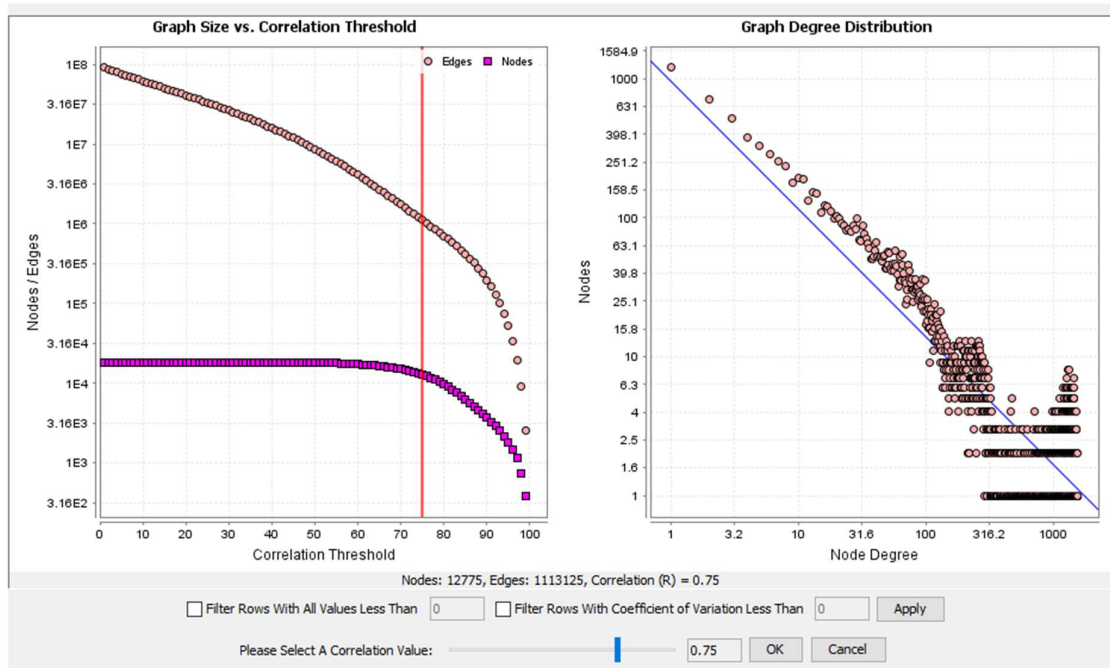

1506

1507

1508 **Figure S1.** Graph size compared with correlation threshold for the analysis of the mouse macrophage  
1509 dataset. The chosen correlation threshold of 0.75 resulted in inclusion of 12,775 nodes making  
1510 1,113,125 edges (correlations of  $\geq 0.75$ ) between them.

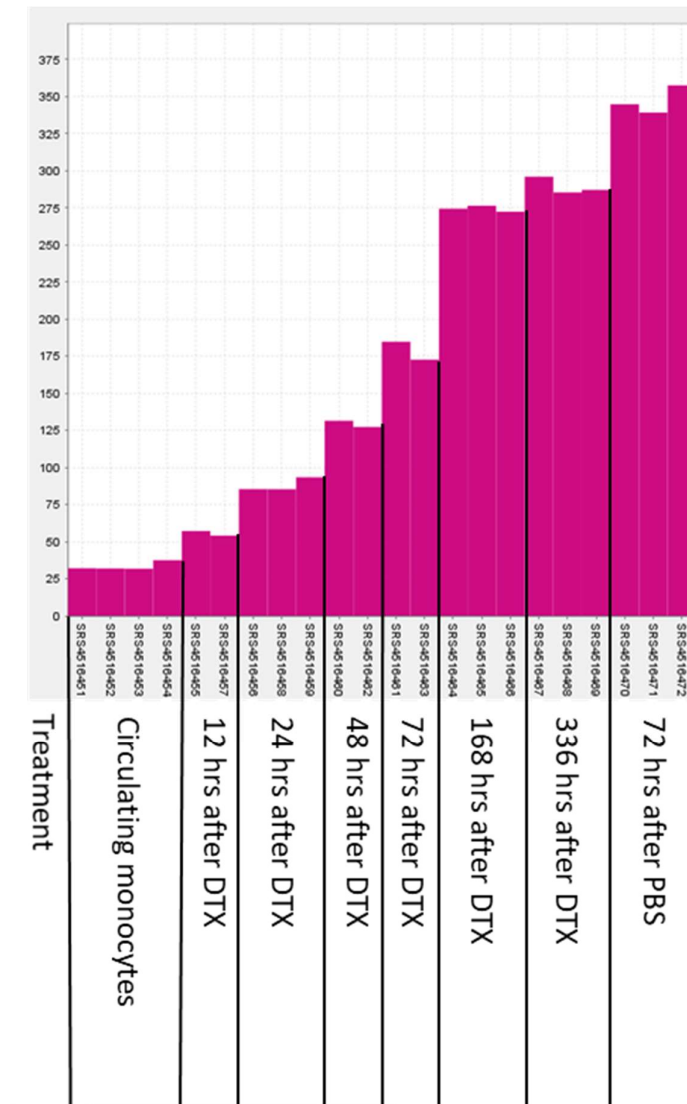

1511

1512

1513 **Figure S2.** Average expression of genes in Cluster 12 during differentiation of monocytes to Kupffer  
1514 cells. Data from BioProject PRJNA528435. *Clec4f*-cre Rosa26iDTX mice were treated with diptheria  
1515 toxin (DTX) to remove mature Kupffer cells livers were harvested at indicated time points after DTX  
1516 treatment. The experiment shows the repopulation of the liver with cells derived from monocytes.  
1517 Control animals were treated with PBS and harvested at 72 hours.



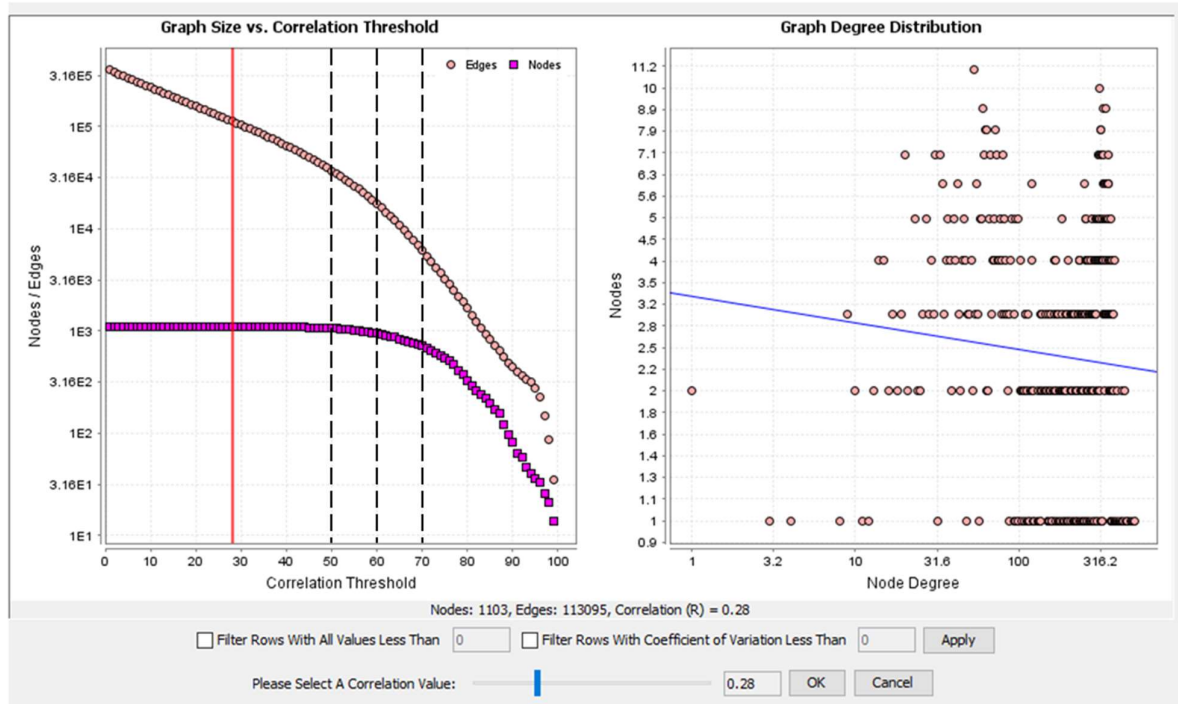

1518

1519

1520 **Figure S3.** Graph size compared with correlation threshold for the analysis of the mouse macrophage  
1521 transcription factor dataset. Red line shows the highest threshold to include all 1103 nodes ( $r \geq 0.28$ ).  
1522 Black broken lines show the three correlation thresholds used in the analysis, 0.5 (1064 nodes), 0.6  
1523 (949 nodes) and 0.7 (714 nodes).
